# Supplementary material for: What counts as patient-important upper gastrointestinal bleeding in the ICU? A mixed-methods study protocol of patient and family perspectives
Source: PubMed Central journal article supplement — BMJ Open. 2023 May 18;13(5):e070966. doi: 10.1136/bmjopen-2022-070966 (PMC10201253; doi:10.1136/bmjopen-2022-070966), 2023-05-18
Supplement: bmjopen-2022-070966.draft_revisions.pdf [file bmjopen-2022-070966.draft_revisions.pdf]

# BMJ Open

BMJ Open is committed to open peer review. As part of this commitment we make the peer review history of every article we publish publicly available.

When an article is published we post the peer reviewers' comments and the authors' responses online. We also post the versions of the paper that were used during peer review. These are the versions that the peer review comments apply to.

The versions of the paper that follow are the versions that were submitted during the peer review process. They are not the versions of record or the final published versions. They should not be cited or distributed as the published version of this manuscript.

BMJ Open is an open access journal and the full, final, typeset and author-corrected version of record of the manuscript is available on our site with no access controls, subscription charges or pay-per-view fees (<http://bmjopen.bmj.com>).

If you have any questions on BMJ Open's open peer review process please email [info.bmjopen@bmj.com](mailto:info.bmjopen@bmj.com)

# BMJ Open

## Patient Important Gastrointestinal Bleeding in the ICU:A Mixed-Methods Study of Patient and Family Perspectives

|                               |                                                                                                                                                                                                                                                                                                                                                                                                                                                                                                                                                                                                                                                                                                                                                                                                                                                                                                                                                                                                                                                                                                                                                                                                                                                                                                                                                                                                                                                                                                                                                                                                                                                                                                                                                                                                                                                                                          |
|-------------------------------|------------------------------------------------------------------------------------------------------------------------------------------------------------------------------------------------------------------------------------------------------------------------------------------------------------------------------------------------------------------------------------------------------------------------------------------------------------------------------------------------------------------------------------------------------------------------------------------------------------------------------------------------------------------------------------------------------------------------------------------------------------------------------------------------------------------------------------------------------------------------------------------------------------------------------------------------------------------------------------------------------------------------------------------------------------------------------------------------------------------------------------------------------------------------------------------------------------------------------------------------------------------------------------------------------------------------------------------------------------------------------------------------------------------------------------------------------------------------------------------------------------------------------------------------------------------------------------------------------------------------------------------------------------------------------------------------------------------------------------------------------------------------------------------------------------------------------------------------------------------------------------------|
| Journal:                      | <i>BMJ Open</i>                                                                                                                                                                                                                                                                                                                                                                                                                                                                                                                                                                                                                                                                                                                                                                                                                                                                                                                                                                                                                                                                                                                                                                                                                                                                                                                                                                                                                                                                                                                                                                                                                                                                                                                                                                                                                                                                          |
| Manuscript ID                 | bmjopen-2022-070966                                                                                                                                                                                                                                                                                                                                                                                                                                                                                                                                                                                                                                                                                                                                                                                                                                                                                                                                                                                                                                                                                                                                                                                                                                                                                                                                                                                                                                                                                                                                                                                                                                                                                                                                                                                                                                                                      |
| Article Type:                 | Protocol                                                                                                                                                                                                                                                                                                                                                                                                                                                                                                                                                                                                                                                                                                                                                                                                                                                                                                                                                                                                                                                                                                                                                                                                                                                                                                                                                                                                                                                                                                                                                                                                                                                                                                                                                                                                                                                                                 |
| Date Submitted by the Author: | 09-Dec-2022                                                                                                                                                                                                                                                                                                                                                                                                                                                                                                                                                                                                                                                                                                                                                                                                                                                                                                                                                                                                                                                                                                                                                                                                                                                                                                                                                                                                                                                                                                                                                                                                                                                                                                                                                                                                                                                                              |
| Complete List of Authors:     | <p>Cook, Deborah; McMaster University<br/> Swinton, Marilyn; McMaster University<br/> Krewulak, Karla; University of Calgary Cumming School of Medicine, Critical Care Medicine<br/> Fiest, Kirsten; University of Calgary Cumming School of Medicine, Critical Care Medicine<br/> Dionne, Joanna; McMaster University, Medicine<br/> Debigare, Sylvie; Canadian Critical Care Trials Group, Patient and Family Partnership Committee<br/> Guyatt, Gordon; McMaster University, Clinical Epidemiology and Biostatistics<br/> Taneja, Shipra; McMaster University, Family Medicine<br/> Alhazzani, Waleed; McMaster University,<br/> Burns, Karen; University of Toronto, Interdepartmental Division of Critical Care Medicine; Unity Health Toronto, Department of Critical Care Medicine<br/> Marshall, John; University of Toronto, Department of Surgery<br/> Muscedere, John; Kingston General Hospital,<br/> Goukos, Audrey; Patient and Family Advisory Committee and Steering Committee Representative<br/> Finfer, Simon; The George Institute for Global Health,<br/> Deane, Adam M; University of Melbourne, Department of Critical Care, Melbourne Medical School<br/> Myburgh, John; University of New South Wales, The George Institute for Global Health<br/> Rochweg, Bram; McMaster University, Medicine (Critical Care)<br/> Ball, Ian; London Health Sciences Centre, Medicine<br/> Mele, Tina; University of Western Ontario, ; University of Western Ontario Schulich School of Medicine and Dentistry,<br/> Niven, Daniel; University of Calgary, Critical Care Medicine<br/> English, Shane; Ottawa Hospital Research Institute, Clinical Epidemiology Program; University of Ottawa, Division of Critical Care, Department of Medicine<br/> Verhovsek, Madeleine; McMaster University, Medicine<br/> Vanstone, Meredith; McMaster University, Family Medicine</p> |
| Keywords:                     | INTENSIVE & CRITICAL CARE, Protocols & guidelines < HEALTH SERVICES ADMINISTRATION & MANAGEMENT, Adult intensive & critical care < INTENSIVE & CRITICAL CARE                                                                                                                                                                                                                                                                                                                                                                                                                                                                                                                                                                                                                                                                                                                                                                                                                                                                                                                                                                                                                                                                                                                                                                                                                                                                                                                                                                                                                                                                                                                                                                                                                                                                                                                             |

1  
2  
3  
4  
5  
6  
7  
8  
9  
10  
11  
12  
13  
14  
15  
16  
17  
18  
19  
20  
21  
22  
23  
24  
25  
26  
27  
28  
29  
30  
31  
32  
33  
34  
35  
36  
37  
38  
39  
40  
41  
42  
43  
44  
45  
46  
47  
48  
49  
50  
51  
52  
53  
54  
55  
56  
57  
58  
59  
60

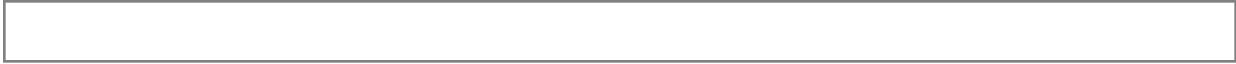

SCHOLARONE™  
Manuscripts

## Patient Important Gastrointestinal Bleeding in the ICU:

### A Mixed-Methods Study of Patient and Family Perspectives

Deborah Cook<sup>1,2,3</sup>, Marilyn Swinton<sup>4</sup>, Karla Krewulak<sup>5</sup>, Kirsten Fiest<sup>5</sup>, Joanna C. Dionne<sup>1,6</sup>, Sylvie Debigare<sup>7</sup>, Gordon Guyatt<sup>1,2</sup>, Shipra Taneja<sup>4</sup>, Waleed Alhazzani<sup>1,2,3</sup>, Karen E. A. Burns<sup>15</sup>, John C Marshall<sup>16</sup>, John G Muscedere<sup>17</sup>, Audrey Gouskos<sup>18</sup>, Simon Finfer<sup>10,11</sup>, Adam Deane<sup>14</sup>, John A Myburgh<sup>10</sup>, Bram Rochweg<sup>1,2,6</sup>, Ian Ball<sup>13</sup>, Tina Mele<sup>12</sup>, Daniel J. Niven<sup>5</sup>, Shane W. English<sup>8,9</sup>, Madeleine Verhovsek<sup>1</sup>, Meredith G. Vanstone<sup>4</sup>

For the Canadian Critical Care Trials Group

1. Department of Medicine, Faculty of Health Sciences, McMaster University, Hamilton, Ontario, Canada
2. Department of Health Research Methods, Evidence, and Impact, Faculty of Health Sciences, McMaster University, Hamilton, Ontario, Canada
3. Department of Critical Care, St. Joseph's Healthcare Hamilton
4. Department of Family Medicine, Faculty of Health Sciences, McMaster University, Hamilton, Ontario, Canada
5. Department of Critical Care Medicine, University of Calgary, Calgary, Alberta, Canada
6. Department of Critical Care, Hamilton Health Sciences, Hamilton, Ontario, Canada
7. Patient and Family Partnership Committee, Canadian Clinical Care Trials Group
8. Department of Medicine (Critical Care), University of Ottawa, Ottawa Ontario Canada
9. Clinical Epidemiology Program, Ottawa Hospital Research Institute, Ottawa Ontario Canada
10. Critical Care Division, The George Institute for Global Health, University of New South Wales, Sydney, NSW, Australia
11. The George Institute for Global Health, School of Public Health, Imperial College London, London, England
12. Department of Surgery and Critical Care Medicine, Western University, London, Ontario, Canada
13. Department of Medicine and Department of Epidemiology and Biostatistics, Western University, London, Ontario, Canada.
14. Department of Critical Care, University of Melbourne, Melbourne Medical School, Victoria, Australia
15. Interdepartmental Division of Critical Care, Department of Medicine, University of Toronto, Toronto, Canada
16. Departments of Surgery and Critical Care Medicine, Unity Health Toronto, University of Toronto, Canada
17. Department of Critical Care Medicine, Queens University, Kingston Health Sciences Center
18. Patient and Family Advisory Committee and Steering Committee representative, FAST-NAWC trial, Toronto, Canada

Correspondence: DJ Cook, Departments of Medicine & Health Research Methods, Evidence and Impact, McMaster University Health Sciences Center, Room 2C11, 1200 Main Street West, Hamilton, Ontario, Canada, L8N 3Z5; debcook@mcmaster.ca, 905-525-9140 x22160

**Funding:** This work was supported by the Hamilton Academy of Health Sciences Organization Grant #HAH-22-009

**Key Words:** Critical care, gastrointestinal bleeding, patient engagement, patient-oriented research, protocol

**Registration:** Clinicaltrials.gov #NCT05506150

## Abstract

**Background:** Clinically important upper gastrointestinal bleeding is conventionally defined as bleeding accompanied by hemodynamic changes, requiring red blood cell transfusions or other invasive interventions. However, it is unclear if this clinical definition reflects patient values and preferences.

**Objective:** To elicit views from patients and families regarding features, tests and treatments for gastrointestinal bleeding that are important to them.

**Design:** Sequential mixed-methods qualitative-dominant multi-center study with an instrument-building aim.

**Methods:** We developed orientation tools and educational materials in partnership with patients and family members, including a slide deck and executive summary. We will invite ICU survivors and family members of former ICU patients to participate. Following a virtual interactive presentation, participants will share their perspectives in an interview or focus group. Qualitative data will be analyzed using inductive qualitative content analysis, wherein codes will be derived directly from the data rather than using preconceived categories. Concurrent data collection and analysis will occur. Quantitative data will include self-reported demographic characteristics.

**Results:** Study results will inform future research, clinical practice, education and health policy. Findings will be relevant for those seeking meaningful engagement of patients and families in clinical investigations, and will promote patient-centered care.

**Ethics & Dissemination:** This study has ethics approval at McMaster University and the University of Calgary. Findings will be disseminated via manuscript and through incorporation as a secondary trial outcome.

**Conclusion:** This study will synthesize the values and perspectives of patients and family members to create a novel trial outcome for a randomized trial of stress ulcer prophylaxis.

## Article Summary

### Strengths & Limitations of This Study

- The protocol describes a rigorous process for building a measure which is responsive to patient preferences
- The protocol was developed in partnership with patient and family partners
- Proposed participants are those with personal or caregiving experience of the Adult ICU. Their perspectives may differ from those with experience of gastrointestinal bleeding.
- Patient partners may differ in demographic and experiential traits from the general ICU population.

**Correspondence:** DJ Cook, Department of Critical Care, St Joseph's Healthcare Hamilton, Departments of Medicine & Health Research Methods, Evidence, and Impact, McMaster University, Room 2C11, 1200 Main Street West, Hamilton, Ontario, Canada, L8N 3Z5; debcook@mcmaster.ca

**Abstract Word Count = 249**

**Manuscript Word Count = 3993**

## Introduction

Patient and family engagement occurs through an active partnership forged among patients, families, clinicians and researchers to improve both health and care. (1) Through their lived experience, patients and families provide a unique perspective on various aspects of research, including investigational priorities. (2) Their engagement can lead to better outcomes and improved satisfaction for patients and families, and cost savings for the healthcare system. (3) For patients in the intensive care unit (ICU) who are usually unable to participate in their own care due to the severity of their illness, partnering with ICU survivors and family members is garnering increased attention. (4-6)

Ethically and scientifically compelling, patient involvement in critical care research can help ensure that the study outcomes are relevant and meaningful to future patients. In service of this tenet, there is a need to create a measure of upper gastrointestinal bleeding that is important to patients and their families. In critically ill patients, minor bleeding is extremely common, but major bleeding is rare, as documented using an ICU-specific bleeding instrument capturing bleeding from any body site. (7) Bleeding from the upper gastrointestinal tract is a well-known complication of critical illness. Early investigations in the ICU setting examining the epidemiology, risk factors and consequences of upper gastrointestinal bleeding often use an outcome of 'clinically important bleeding' which was developed from the practitioner's perspective. The criteria were based on aberrant physiology and associated required interventions, (8, 9) modified to distinctly incorporate vasopressors. (10, 11) Clinically important gastrointestinal bleeding is defined as overt bleeding *in the absence of other causes* with one of the following features: 1) spontaneous decrease in systolic (SBP) or diastolic (DBP) blood pressure of >20 mmHg within 24 hours of upper GI bleeding, 2) an orthostatic increase in HR >20 beats/minute and a decrease in SBP of >10 mmHg, 3) initiation of vasopressors or increase in their infusion rate of >20%, 4) a decrease in hemoglobin of >2 g/dl (20 g/l) in 24 hours, or 5) transfusion of >2 units of red blood cells within 24 hours of bleeding. While this definition has been used in several large studies, it does not take into account the views of patients and/or their families.

Other definitions and classifications of bleeding from any site are available, such as those of the World Health Organization (12) and International Society of Hemostasis and Thrombosis (13) and the HEME tool that was specifically developed to classify bleeding in critically ill patients. (7) However, none of these definitions or tools are focused on bleeding from the gastrointestinal tract, and none have been developed with patient and family input. Incorporating patient and family perspectives is crucial to ensure that bleeding research not only acknowledges, but intentionally incorporates patient preferences and experiences – whether they are aware of, or personally experienced or observed this type of bleeding.

Aligned with the International Association of Public Participation principles, (14) we will collaborate with ICU survivors and family members in research with the dual purpose of learning from their experiences and integrating their perspectives on which aspects of gastrointestinal bleeding during critical illness are most important to them. We understand 'patient important bleeding events' to be those that would, in the absence of any other benefits, lead patients to consider receiving an intervention to treat the bleed, or are associated with appreciable harm, distress, burden, or personal cost. (13, 15) Some aspects of bleeding that concern clinicians may not concern patients in the ICU who are generally unaware of adverse events due to their impaired consciousness. For example, receipt of inotropes or vasopressors may not be as meaningful to ICU patients as to clinicians, as critically ill patients are typically unaware that the infusion represents a form of advanced life support. By contrast, transfusions may be more concerning to patients than clinicians, especially if they are not fully informed of contemporary blood product safety. (16)

In critical care medicine, there is a dearth of research directly informed by legitimate public engagement, representing untapped potential. (6) This Patient Important Bleeding Study will engage patients and families to create a definition of what matters most to them regarding tests and treatments used for upper gastrointestinal bleeding. (17) Results will directly inform the definition of patient important bleeding which is a secondary outcome in an ongoing international trial comparing stress ulcer prophylaxis with pantoprazole versus placebo – the Re-Evaluating the Inhibition of Stress Erosions (REVISE) Trial – the primary outcome of which is clinically important upper gastrointestinal bleeding. (18)

## Objective, Question and Hypothesis

1  
2  
3 The overall objective of this study is to elicit the views of patients and families regarding features, tests  
4 and treatment for gastrointestinal bleeding that are important to them. The research question is 'What are  
5 the most concerning tests and treatments to patients and families in the event of an upper gastrointestinal  
6 bleed?' Our hypothesis is that patients and families will be concerned about some bleeding tests and  
7 treatments (e.g., invasive procedures), while they will be comfortable with others (e.g., vasopressor  
8 infusion into a pre-existing intravenous access), even if this represents increased treatment intensity. We  
9 also hypothesize that regardless of their views regarding particular tests or treatments, they will be  
10 concerned if bleeding results in a longer hospital stay or if a patient dies with or from bleeding.

## 11 Design

12 This is a sequential mixed-methods, qualitative-dominant, multi-center study with an instrument-building  
13 aim. (19, 20) In this protocol manuscript, we describe the collection and analysis of qualitative data used  
14 to build an instrument, operationalized as a multicomponent definition of patient important bleeding. This  
15 instrument will be used to collect quantitative data for an outcome in patients enrolled in an international  
16 RCT of stress ulcer prophylaxis. Pilot work began in 2021 and trial completion is anticipated in 2023.

## 18 Participants

19 Adult patients  $\geq 18$  years of age who were admitted to ICU  $\geq 72$  hours and family members of adult ICU  
20 patients in ICU for  $\geq 72$  hours (unlinked), regardless of bleeding experience, ICU survival, health literacy  
21 or professional health care training. Eligible patient participants must have been discharged from hospital  
22 after their episode of critical illness. Individuals will be excluded if they have prohibitive communication  
23 challenges (e.g., serious psychological or psychiatric illness that prevents the individual from consenting  
24 to participate in research or providing their perspective, insufficient ability to read and speak English or  
25 other languages for which a research staff or family interpreter exists). To avoid confounding by previous  
26 participation in related research, we will exclude patients enrolled in REVISE and family members of  
27 patients enrolled in REVISE.

## 29 Sampling Strategies

30 Multiple perspectives will be sought by sampling ICU survivors and family members of critically ill patients  
31 with diverse demographics and life experiences across several jurisdictions. We will use *criterion*  
32 *sampling* to identify possible participants who satisfy our inclusion and exclusion criteria. We will use  
33 *convenience sampling* based on contacts of our investigative clinical team. We will use *chain referral*  
34 *(snowball) sampling* to identify other possible participants working as hospital-based or research-  
35 associated patient or family partners. The initial sample will use a maximum variation approach so that  
36 analysis of preliminary data may identify relevant experiential or demographic traits which should be  
37 explored with further criterion sampling.

38 To invite participants, we will engage pre-existing patient and family partners involved in the Patient and  
39 Community Engagement Research (PaCER) group, seeking contact using existing mailing lists and social  
40 media groups, including those of the Alberta SPOR (Strategy for Patient-Oriented Research) Support  
41 Unit. We will use similar strategies to invite potential participants associated with the Canadian Critical  
42 Care Trials Group (CCCTG) Patient and Family Partnership Committee. (21) In Kingston, London,  
43 Toronto, Ottawa and Hamilton, our team of clinical investigators will email potential participants drawn  
44 from existing patient and family partners who are affiliated with their healthcare organizations or studies.  
45 The invitational emails will contain information about the study and ask potential participants to contact  
46 the investigators if interested.

47  
48 We created an infographic to depict the study methods to share with potential participants, particularly  
49 those who are already research partners in other studies [Figure 1]

## 51 Sample Size

52 The sample size projection is based on our estimate that approximately 40-50 individual participants will  
53 be needed to reach data saturation. This method of assessing sufficiency of qualitative data requires  
54 periodic assessment by multiple individuals who reach consensus through discussion on whether existing  
55 data adequately answers the research question and allows the researchers to offer a consistent  
56 explanation for all relevant perspectives. (22) The final sample size will be confirmed as data collection  
57  
58



1  
2  
3 progresses, but the theory of information power indicates we will likely need a large sample due to the  
4 heterogeneity of experiences, relatively little direct experience with the phenomenon of interest, and the  
5 lack of an underpinning explanatory theory to explain what aspects of gastrointestinal bleeding are likely  
6 to be meaningful to patients. (23) Data saturation will be assessed periodically by 5 investigators through  
7 a review of transcripts and coding reports, and audit trail examination. Feasibility of enrolment will be met  
8 when at least 15 patients and at least 15 family members are recruited, with representation from several  
9 regions, strong representation from each decision-maker (patient, family), and at least 80% participation  
10 for invited individuals.

### 11 **Preparatory Work**

12 In preparation for this study, in Calgary, we developed the orientation and education tools, refined with  
13 input from a patient partner, family partner, bedside ICU nurse, and 3 research staff not involved in the  
14 project. In Hamilton, informal in-person discussions with 8 ICU patients who experienced gastrointestinal  
15 bleeding helped to plan the scope of questions for the interview and focus group guide. A mock interview  
16 with a patient partner and a 5-person mock focus group in Calgary informed the content tone and pacing  
17 of the questions, as well as the degree of detail and terminology.

### 18 **Orientation and Education Tools**

19 Informed input from patients and families requires a basic understanding of the various presentations of  
20 upper gastrointestinal bleeding, possible physiologic changes, diagnostic tests, and therapeutic  
21 interventions. In partnership with patients and family members, we developed a slide deck containing  
22 approximately 20 images of upper gastrointestinal bleeding, tests and treatments as a companion to the  
23 verbal presentation that will orient participants preceding each interview or focus group. Each test and  
24 treatment are described in terms of how commonly it is used, its purpose, and possible discomforts or  
25 side-effects. We also created a 2-page written summary describing upper gastrointestinal bleeding, tests  
26 and treatments in text directed at grade 8 reading level. Thus, we will use written visual and oral  
27 approaches to depict and discuss the phenomena tailored to a lay audience, prior to the interviews and  
28 focus groups.

### 29 **Pilot Testing of Education and Orientation Tools**

30 Before finalizing the written summary and slide deck, we obtained unstructured feedback until no new  
31 feasible ideas for improvement were obtained. From a pre-existing group of patient and family partners  
32 affiliated with the PaCER group, suggestions from 2 patients and 2 family members were captured with  
33 typed notes, coded, and anonymized at source. [\[Appendix Text 1\]](#).

### 34 **Interview and Focus Group Guide Development**

35 Employing both interviews and focus groups allows triangulation of data collection methods. (24) We  
36 developed a 4-page interview and focus group guide using open-ended questions to elicit patient and  
37 family views of what matters most about this complication of critical illness. We started with in-person and  
38 e-discussions amongst the investigative team. We partnered with one former ICU patient associated with  
39 the PaCER group and one family advisor associated with the CCCTG Patient and Family Partnership  
40 Committee.

### 41 **Pilot Testing of Interview and Focus Group Guides**

42 We elicited feedback on the clarity, comprehensiveness and redundancy of the questions and prompts in  
43 the draft interview and focus group guides, modifying them per suggestions. This was achieved by a pilot  
44 interview with 1 former ICU patient and a pilot focus group of 5 family members in Calgary and Hamilton  
45 (6 persons in total). Quantitative descriptors of pilot participants were anonymized and entered in an  
46 Excel® v.16.6 database [Microsoft Corporation, Redmond, Washington]. Feedback from the pilot  
47 interview and focus group was captured with typed notes, anonymized at source for future use, but was  
48 neither audiotaped nor transcribed. [\[Appendix Text 2, Appendix Text 3\]](#).

### 49 **Interviewer Training**

50 Two experienced qualitative interviewers in Hamilton and Calgary received training to harmonize their  
51 interviewing approach. We ensured calibration by having them use a common guide, both attending  
52 interviews and focus groups in the pilot phase, and discussing data collection at team meetings.

## Main Study

### Qualitative Data Collection: Individual Interviews and Focus Groups

We will conduct individual interviews (45-60 minutes in duration) and focus groups (90-120 minutes in duration) with former patients or family members associated with healthcare institutions in Hamilton, Kingston, London, Ottawa, Toronto or Calgary. Focus groups will be comprised of 2-5 patients or family members.

One of two interviewers and one observer will be present at each interview or focus group, along with the participant(s) and the investigator who will give the presentation. Following introductions, the interviewer will affirm consent and refer to the pre-circulated 2-page document summarizing tests and treatments. An orienting interactive slide presentation will follow, encouraging questions or clarifications on the content, after which the presenter will leave the videoconference. Although discussion about costs to the healthcare system may arise, we will clarify that our focus is not the cost of tests or treatments, or the economic consequences of bleeding.

The interview will be audio-recorded and transcribed verbatim. The observer will take field notes during and after each interview or focus group. These notes will record non-verbal communication (e.g., nodding in agreement with a verbal comment of another participant), reflect on process issues, and offer summaries of key ideas shared during the data collection session. At the end of each interview or focus group, we will ask participants to reflect on their research experience, which will also be incorporated into typed field notes, coded, and anonymized at source.

### Quantitative Data Collection

We will obtain quantitative data describing participants including age, sex, race, city of residence, and any professional healthcare role. About the patient, we will collect the hospital name, reason for the patient's ICU admission, and (if known to participant) whether the patient had experienced gastrointestinal bleeding in the ICU. We recognize that participants may not know if gastrointestinal bleeding developed in the ICU. Given that experiencing or witnessing a bleed may inform participant perspectives on bleeding, documenting a bleeding event is only relevant *if the participant was aware of the bleeding*. For this reason, we will not objectively verify whether the patient developed bleeding. For family members, we will document their relationship to the patient (e.g., child, partner, sibling, friend), and corresponding information as above.

## Analyses

### Qualitative Analyses

De-identified transcripts will be imported into NVivo® [QSR International, Melbourne, Australia] for data management and analysis. We will conduct a qualitative descriptive analysis, aiming to create a descriptive summary of study findings, organized and presented in the language of the participants with minimal theoretical interpretation. (25) Data will be analyzed using qualitative content analysis, whereby codes are derived directly from the data rather than using preconceived categories. (26) As data collection proceeds, new information and insights will be incorporated into data collection and analysis, making the processes reflexive and interactive.

Five investigators will participate in the initial (open) coding, reading data to form a comprehensive list of codes. Specifically, we will use open coding, group discussion and reconciliation, to identify categories reflecting patient-important considerations (e.g., *familiarity*, *safety*, *effectiveness*, *invasiveness*, *etc.*) on which we will center additional data collection and coding (focused coding). These considerations will be derived inductively from participant comments on bleeding characteristics, tests, and treatments that matter most to them. For example, the *familiarity* of a test, or the *effectiveness* of the treatment might be identified as key patient-important considerations.

The next round of coding will involve deductively matching each consideration to participants' expressions about each test or treatment. This focused framework coding will generate data about how each test or treatment is understood in relation to the general patient-important considerations. For example, at this

1  
2  
3 stage we will be able to describe how participants perceive the *safety* of endoscopy as a test, and how  
4 they perceive the *invasiveness* of angio-embolization as treatment.  
5

6 In the next round of coding, investigators will work to further categorize each test or treatment according  
7 to each consideration. For example, to what degree are participants concerned about the *effectiveness* of  
8 acid suppression? In this stage, we will also describe how consistently participants comment on each test  
9 or treatment in light of these considerations and assess the degree to which participants have convergent  
10 or divergent views.

11 Preliminary results will be shared with the broader group of interdisciplinary collaborators for further  
12 discussion (investigator triangulation). Results will also be shared with 2-4 patients and family participants  
13 via videoconference meeting to inquire about whether the findings resonate with their perspectives,  
14 exploring the credibility of the findings (member checking). (27)  
15

### 16 **Quantitative Analyses**

17 Data describing patient and family member characteristics will be analyzed using descriptive statistics,  
18 measures of central tendency and dispersion, and proportions.  
19

### 20 **Ethics**

21 This study has Research Ethics Board (REB) approval at McMaster University (HIREB #9492), and the  
22 University of Calgary Conjoint Health Research Ethics Board (REB20-0120).  
23

24 Potential adverse effects of patient engagement in research from patients' perspectives identified in a  
25 recent systematic review related to frustrations with training, transportation, or tokenism - or a false  
26 impression of inclusiveness, thereby devaluing patients' input. (28) Advice from our patient partner and  
27 family partner who are investigators on this study will ensure that we collaborate sensitively, avoid  
28 inauthentic engagement, ensure respectful communication, and offer appropriate compensation for their  
29 time.  
30

### 31 **How will the Results be Used?**

32 The findings from this study will have several implications. From the *research* perspective, results will be  
33 used to refine a novel secondary outcome of the ongoing REVISE trial, ensuring that the evidence  
34 produced by the trial will be patient and family-centered. The design could serve as a template for clinical  
35 research methodologists interested in meaningful citizen engagement in research. This new outcome will  
36 be useful for investigators recognizing the importance of incorporating patient and family perspectives  
37 when designing studies on the incidence, risk factors, consequences, prevention, and management of  
38 gastrointestinal bleeding in the ICU.

39 Bleeding rates in the literature may be more conditional on different bleeding definitions and assessment  
40 methods than on actual bleeding. (29) Unclear and variable gastrointestinal bleeding definitions across  
41 studies over decades make inferences challenging when summarizing studies about gastrointestinal  
42 bleeding rates, risk factors, and consequences. This study will inform the interpretation of future RCTs,  
43 systematic reviews, network meta-analyses (30) and practice guidelines with an emphasis on the values  
44 of patients and families.  
45

46 From the *practice* perspective, the results of this study will inform clinicians about how to better support  
47 patients and families to explain the characteristics of diagnostic and treatment options when  
48 gastrointestinal bleeding occurs in the ICU. From the *educational* perspective, our data will help clinical  
49 teachers understand how bleeding is perceived by patients and families, aiding conversations and  
50 counselling regarding tests and treatments for bleeding which are of greatest concern to them. From the  
51 *health system* perspective, the results of this study will further the goal of person-centered healthcare  
52 which honours patient and family values and perspectives as key evidence.  
53

### 54 **Discussion**

#### 55 **Patient Partnership**

56  
57  
58  
59  
60

1  
2  
3 As a mixed-methods study, whereby qualitative data are dominant and patient and family partnership is  
4 paramount, we have already engaged several ICU survivors and family members in completed pilot work.  
5 They have helped to develop the educational tools, improve the data collection instruments, and refine  
6 the interview guide. We will orient participants to the problem of upper gastrointestinal bleeding by a pre-  
7 circulated text summary and standardized slide deck that was co-created by patient and family partners.  
8 To ensure that participants have an understanding of the ICU context, we will use criterion sampling to  
9 recruit participants who have lived experience with critical illness but avoid an exclusive focus on  
10 participants with self-reported high health literacy. An experienced patient partner and family partner are  
11 study coinvestigators.

### 12 **Strengths**

13 Additional study strengths include the methods which accord with increasingly recommended or required  
14 patient involvement in the design, conduct, and dissemination of health research. (3, 31, 32) The  
15 qualitative methods allow us to organize, clarify and summarize non-numerical data to build a definition of  
16 patient important bleeding. Future findings will be grounded in the views of members of the public with  
17 lived critical care experience, rather than specialized practitioners. To maximize the generalizability of  
18 responses, this multicenter study will include participants reflecting hospital catchment areas in at least 3  
19 Canadian provinces.

### 20 **Limitations**

21 Limitations of this study include no numerical measures of bleeding attributes or preference rankings, as  
22 we are eliciting views and values from patients and families using an open-ended, qualitative approach.  
23 The goal is not to exclusively characterize morbidity and mortality features of the bleed that are  
24 concerning (e.g., short-term risk of death, or long-term disability); indeed we assume that bleeding which  
25 leads to death or disability is very important to patients. Our main focus is on tests and treatments used to  
26 locate and limit the bleeding in order to add additional granularity to what patients find important about  
27 bleeding beyond the obvious consequences of dying with or from bleeding. Context is crucial here; out-  
28 patients and ward patients with acute or chronic illnesses may have different concerns than ICU patients  
29 (e.g., they may be understandably more alarmed about minor bleeds compared to ICU survivors and their  
30 families). Thus, our results will not apply to bleeding from sites other than the gastrointestinal system, or  
31 to community-dwelling citizens or hospitalized patients who are not critically ill.

### 32 **Knowledge Translation**

33 *Integrated knowledge translation* is reflected in several patients and family members being integral to the  
34 pilot work. Furthermore, a CCCTG Patient and Family Partnership Committee family member and an  
35 experienced patient partner are coinvestigators who helped to design this study. *End-of-study knowledge*  
36 *translation* will include incorporating results to refine our placeholder definition of patient important  
37 bleeding - presently overt bleeding resulting in invasive tests or treatments.

38 We will share findings at investigator and CCCTG meetings. Peer-review presentations at international  
39 conferences in critical care, gastroenterology and hematology will coincide with or precede open-access  
40 peer-review publications. We will translate findings into different languages for diverse audiences in  
41 traditional and social media. Our patient and family coinvestigators will help to create an infographic of  
42 our findings and clinician-facing educational materials to teach about procedural explanations for  
43 gastrointestinal bleeding.

### 44 **Future Research Implications**

45 While the patient important gastrointestinal bleeding definition derived from this study will serve as the  
46 quantitative instrument for this secondary outcome in the REVISE Trial, results will also have implications  
47 for sample size calculations in future trials on this topic. (33) Patients' and clinicians' views may differ  
48 when considering trade-offs related to bleeding. When the current study and the REVISE Trial are  
49 complete, it would be worthwhile to explore patient and family perceptions about the balance of risks and  
50 benefits of pantoprazole prophylaxis in terms of bleeding, pneumonia, *Clostridioides difficile* and mortality.  
51 One study of physicians who treat atrial fibrillation and patients with, or at risk of, developing atrial  
52 fibrillation, explored the maximal increased risk of bleeding that respondents would tolerate with warfarin  
53 versus aspirin to achieve a reduction in stroke over 2 years. (34) The variability in patient and physician  
54  
55  
56  
57  
58  
59  
60

1  
2  
3 values regarding trade-off between bleeds and strokes likely reflects differential aversion to  
4 anticoagulation-associated bleeding and stroke risks. Another study of diverse healthcare providers  
5 showed substantial variation in whether and when to restart oral anticoagulation after gastrointestinal  
6 bleeding. (35)  
7

### 8 **Conclusions**

9 This mixed-methods study will elicit the values of patients and families to help create a novel empirically-  
10 based definition of patient important gastrointestinal bleeding, thereby informing the development of a  
11 new secondary outcome in the REVISE trial. Results will complement the standard measure of clinically  
12 important gastrointestinal bleeding, ensuring that future trial results are meaningful through the public  
13 lens. Findings will be relevant for those seeking to engage patients and families in health research and  
14 promote patient-centered care.  
15

### 16 **Acknowledgements**

17 This Patient Important Bleeding Study could not be completed without the patients and family members  
18 who agreed to share their time and perspectives. We are grateful to the Patient and Community  
19 Engagement Research Partners including Nadine Foster and Bonnie Sept who piloted the interview and  
20 focus group guide and provided feedback on the 2-page orienting document and slide deck presentation.  
21 We appreciate the preparatory work for this project by Nubia Zepeda and Carmen Hiploylee from the  
22 University of Calgary Critical Care Research Group, as well as Alyson Takaoka, Mary Copland and Nicole  
23 Zytaruk at McMaster University. We thank the Research Coordinators and Investigators of the REVISE  
24 Trial and the Canadian Critical Care Trials Group for their encouragement on this project, as well as Dr.  
25 Danae Tassy for suggestions on this manuscript. This study was funded by a grant from the Hamilton  
26 Academic Health Sciences Organization.  
27

28 **Protocol:** Available to interested readers by contacting Dr. Cook ([debcook@mcmaster.ca](mailto:debcook@mcmaster.ca))  
29

30 **Computer code:** Not relevant, no computer code will be used to generate the results.  
31

32 **Author contribution:** All authors contributed towards the ORIGINAL research idea and provided input  
33 into the design of the study. DJC, ST, MS, KK, MGW designed the protocol, drafted and revised the  
34 manuscript.  
35

36 **Conflict of Interest:** The following individuals are investigators for the randomized trial REVISE: : DJC,  
37 JCD, GG, WAH, KEAB, JCM, JGM, SF, AD, JAM, BR, IB, TM, DJN, SWE. We have no other conflicts of  
38 interest to declare.  
39

40 **Data:** Not available.  
41

42 **Data Statement:** Readers are welcome to contact the research team for further information. In brief,  
43 when participants consented to participating in the study, they did not consent to access to transcripts or  
44 data beyond what is reported within this report.  
45

46 [Figure 1: Protocol Infographic](#)

47 [Appendix Text 1: Summary Text](#)

48 [Appendix Text 2: Interview Guide](#)

49 [Appendix Text 3: Focus Group Guide](#)  
50  
51  
52  
53  
54  
55  
56  
57  
58  
59  
60



## References

1. Carman KL, Dardess P, Maurer M, Sofaer S, Adams K, Bechtel C, et al. Patient and family engagement: a framework for understanding the elements and developing interventions and policies. *Health affairs*. 2013;32(2):223-31.
2. Shippee ND, Domecq Garces JP, Prutsky Lopez GJ, Wang Z, Elraiyah TA, Nabhan M, et al. Patient and service user engagement in research: a systematic review and synthesized framework. *Health expectations*. 2015;18(5):1151-66.
3. Canadian Institutes for Health Research. Strategy for Patient Oriented Research: Patient Engagement Framework. 2014.
4. Farrier CE, Stelfox HT, Fiest KM. In the pursuit of partnership: patient and family engagement in critical care medicine. *Current Opinion in Critical Care*. 2019;25(5):505-10.
5. Burns KE, Jacob SK, Aguirre V, Gomes J, Mehta S, Rizvi L. Stakeholder engagement in trial design: survey of visitors to critically ill patients regarding preferences for outcomes and treatment options during weaning from mechanical ventilation. *Annals of the American Thoracic Society*. 2016;13(11):1962-8.
6. Burns KE, Misak C, Herridge M, Meade MO, Oczkowski S. Patient and family engagement in the ICU. Untapped opportunities and underrecognized challenges. *American journal of respiratory and critical care medicine*. 2018;198(3):310-9.
7. Arnold DM, Donahoe L, Clarke FJ, Tkaczyk AJ, Heels-Ansdell D, Zytaruk N, et al. Bleeding during critical illness: a prospective cohort study using a new measurement tool. *Clinical and investigative medicine*. 2007:E93-E102.
8. Cook D, Guyatt G, Marshall J, Leasa D, Fuller H, Hall R, et al. A comparison of sucralfate and ranitidine for the prevention of upper gastrointestinal bleeding in patients requiring mechanical ventilation. *New England Journal of Medicine*. 1998;338(12):791-7.
9. Cook DJ, Fuller HD, Guyatt GH, Marshall JC, Leasa D, Hall R, et al. Risk factors for gastrointestinal bleeding in critically ill patients. *New England journal of medicine*. 1994;330(6):377-81.
10. Krag M, Marker S, Perner A, Wetterslev J, Wise MP, Schefold JC, et al. Pantoprazole in patients at risk for gastrointestinal bleeding in the ICU. *New England Journal of Medicine*. 2018;379(23):2199-208.
11. Krag M, Perner A, Wetterslev J, Wise MP, Borthwick M, Bendel S, et al. Prevalence and outcome of gastrointestinal bleeding and use of acid suppressants in acutely ill adult intensive care patients. *Intensive care medicine*. 2015;41(5):833-45.
12. Miller A, Hoogstraten B, Staquet M, Winkler A. Reporting results of cancer treatment. *cancer*. 1981;47(1):207-14.
13. Rodeghiero F, Tosetto A, Abshire T, Arnold D, Collier B, James P, et al. ISTH/SSC bleeding assessment tool: a standardized questionnaire and a proposal for a new bleeding score for inherited bleeding disorders. *Journal of Thrombosis and Haemostasis*. 2010;8(9):2063-5.
14. IAP2 Spectrum of Public Participation. International Association for Public Participation. Louisville, CO: International Association for Public Participation; 2018.
15. Guyatt G, Montori V, Devereaux P, Schunemann H, Bhandari M. Patients at the center: in our practice, and in our use of language. *ACP journal club*. 2004;140(1):A11.

16. Davis RE, Vincent CA, Murphy MF. Blood transfusion safety: the potential role of the patient. *Transfusion medicine reviews*. 2011;25(1):12-23.
17. ClinicalTrials.gov. Patient Important Gastrointestinal Bleeding in the ICU ClinicalTrials.gov2022 [updated Aug 18 2022. Available from: <https://clinicaltrials.gov/ct2/show/NCT05506150?cond=patient+important+bleeding&draw=2&rank=1>.
18. ClinicalTrials.gov. Re-Evaluating the Inhibition of Stress Erosions (REVISE) Trial ClinicalTrials.gov2017 [updated March 16 2022. Available from: <https://clinicaltrials.gov/ct2/show/NCT03374800>.
19. Tashakkori A, Teddlie C, Teddlie CB. *Mixed methodology: Combining qualitative and quantitative approaches*: sage; 1998.
20. Creswell JW, Fetters MD, Ivankova NV. Designing a mixed methods study in primary care. *The Annals of Family Medicine*. 2004;2(1):7-12.
21. Canadian Critical Care Trials Group. Canadian Critical Care Trials Group 2022 [Available from: <https://www.ccctg.ca/>.
22. Saunders B, Sim J, Kingstone T, Baker S, Waterfield J, Bartlam B, et al. Saturation in qualitative research: exploring its conceptualization and operationalization. *Quality & quantity*. 2018;52(4):1893-907.
23. Malterud K, Siersma VD, Guassora AD. Sample size in qualitative interview studies: guided by information power. *Qualitative health research*. 2016;26(13):1753-60.
24. Golafshani N. Understanding reliability and validity in qualitative research. *The qualitative report*. 2003;8(4):597-607.
25. Sandelowski M. Whatever happened to qualitative description? *Research in nursing & health*. 2000;23(4):334-40.
26. Hsieh H-F, Shannon SE. Three approaches to qualitative content analysis. *Qualitative health research*. 2005;15(9):1277-88.
27. Birt L, Scott S, Cavers D, Campbell C, Walter F. Member checking: a tool to enhance trustworthiness or merely a nod to validation? *Qualitative health research*. 2016;26(13):1802-11.
28. Domecq JP, Prutsky G, Elraiyah T, Wang Z, Nabhan M, Shippee N, et al. Patient engagement in research: a systematic review. *BMC health services research*. 2014;14(1):1-9.
29. Heddle NM, Cook RJ, Webert KE, Sigouin C, Rebullia P, Transfusion BEfSTWPotISfB. Methodologic issues in the use of bleeding as an outcome in transfusion medicine studies. *Transfusion*. 2003;43(6):742-52.
30. Wang Y, Ge L, Ye Z, Siemieniuk RA, Reintam Blaser A, Wang X, et al. Efficacy and safety of gastrointestinal bleeding prophylaxis in critically ill patients: an updated systematic review and network meta-analysis of randomized trials. *Intensive Care Medicine*. 2020;46(11):1987-2000.
31. National Institute for Health Research. *Patient and public involvement in health and social care research: a handbook for researchers*. 2018.
32. Patient Centered Outcomes Research Institute. Suggest a Patient-Centered Research Question 2012 [updated June 14 2019. Available from: <https://www.pcori.org/engagement/engage-us/suggest-patient-centered-research-question>.

- 1  
2  
3 33. van Baarle FE, van de Weerd EK, Suurmond B, Müller MC, Vlaar AP, Biemond  
4 BJ. Bleeding assessment and bleeding severity in thrombocytopenic patients  
5 undergoing invasive procedures. *Transfusion*. 2020;60(3):637.  
6  
7 34. Devereaux P, Fahey T, Anderson DR, Gardner MJ, Putnam W, Flowerdew GJ, et  
8 al. Differences between perspectives of physicians and patients on anticoagulation in  
9 patients with atrial fibrillation: observational study  
10 Commentary: Varied preferences reflect the reality of clinical practice. *Bmj*. 2001;323(7323):1218.  
11  
12 35. Little DH, Robertson T, Douketis J, Dionne JC, Holbrook A, Xenodemetropoulos  
13 T, et al. Management of antithrombotic therapy after gastrointestinal bleeding: A mixed  
14 methods study of health - care providers. *Journal of Thrombosis and Haemostasis*.  
15 2021;19(1):153-60.  
16  
17  
18  
19  
20  
21  
22  
23  
24  
25  
26  
27  
28  
29  
30  
31  
32  
33  
34  
35  
36  
37  
38  
39  
40  
41  
42  
43  
44  
45  
46  
47  
48  
49  
50  
51  
52  
53  
54  
55  
56  
57  
58  
59  
60



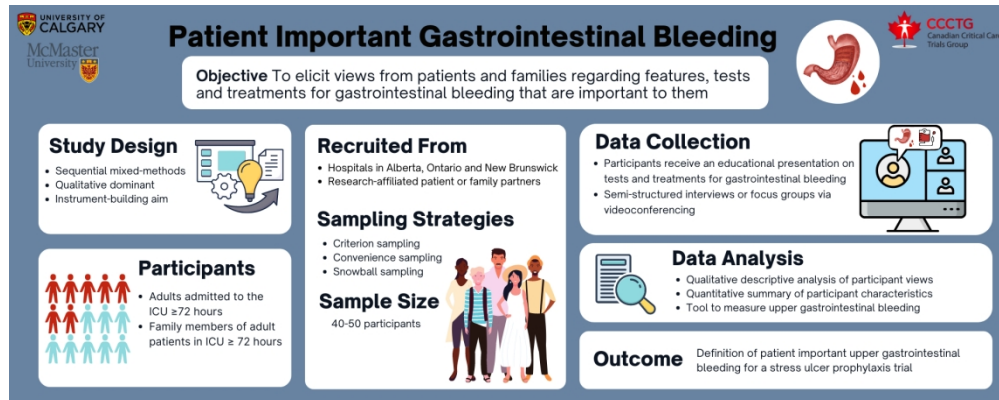

An outline of the methods

1336x534mm (38 x 38 DPI)

## Patient Important Gastrointestinal Bleeding in the Intensive Care Unit

The **gastrointestinal (GI) tract** is divided into the upper and lower GI tract. The upper GI tract includes the mouth, esophagus (food pipe), stomach, and duodenum (first part of the small intestine). The lower GI tract includes the rest of the small intestine, bowel (large intestine), and rectum. We will mainly focus on the **stomach**.

The inside of the stomach is very acidic because of the gastric juices it makes. The acid helps the stomach stay sterile between meals and protects it from bacteria, viruses and other organisms that we eat every day. Sometimes, the acidity of the stomach can become too high. Too much acidity can damage the stomach lining and cause **ulcers**. Ulcers can lead to bleeding in the stomach. Medications called **antacids** can make the stomach less acidic.

ICU patients are likely to develop stomach ulcers, which can cause bleeding. There are many reasons why they are likely to develop stomach ulcers. For example, if ICU patients are on a breathing machine for at least 48 hours or have low blood pressure, the stomach lining becomes weak, and the stomach can become more acidic than usual. Acidity that is too high in the stomach can lead to stomach ulcers. Antacid medication, such as pantoprazole is given to ICU patients to prevent ulcers. However, antacid medication can change a patient's natural defense against infections and can have side effects.

We are currently conducting a research study called, "**Re-Evaluating the Inhibition of Stress Erosions: The REVISE Trial.**" The REVISE study will look at the benefits and risks of pantoprazole in ICU patients who are on a breathing machine for at least 48 hours. We will look at whether pantoprazole can reduce the number of patients with GI bleeding and reduce the number of patients who die from GI bleeds (potential benefits of pantoprazole). We will also record the side effects of the medication (eg. lung infections, infectious diarrhea) (potential risks of pantoprazole). We will compare the patients that receive pantoprazole with those that do not receive pantoprazole and look at the benefits and harm of giving the medication. We want to answer the question, should doctors and nurses continue giving pantoprazole to ICU patients on a breathing machine?

Doctors and nurses know what characteristics of a patient's GI bleed are important to them. If there are changes to the patient's heart rate, blood pressure, or abnormal blood results - these are important signs that the doctors and nurses look for and are called **clinically important bleeding**. However, we are missing something very crucial. We don't understand what is important to the patients in the ICU and their families. This is referred to as **patient important bleeding**.

Now that you know more about GI bleeding we want to teach you about the different ways to find and treat a GI bleed.

**TREATMENTS:**

A GI bleed can be treated with the following:

| Therapy                          | Purpose                                               | How Often it is Necessary                                           | Possible Adverse Effects or Discomforts                                                                                                                                  |
|----------------------------------|-------------------------------------------------------|---------------------------------------------------------------------|--------------------------------------------------------------------------------------------------------------------------------------------------------------------------|
| Antacid Drugs                    | To help heal the ulcers                               | <b>ALMOST ALWAYS.</b> Every day for 2-3 months to treat every bleed | <b>SOMETIMES.</b> Pneumonia (lung infection)<br><br><b>VERY RARELY.</b> Infectious diarrhea                                                                              |
| Drugs to Increase Blood Pressure | To increase blood pressure when it is dangerously low | <b>SOMETIMES.</b> Every time blood pressure is dangerously low      | <b>COMMONLY.</b> Very fast heart rate                                                                                                                                    |
| Blood Transfusion                | To replace lost blood                                 | <b>SOMETIMES.</b> It depends on the amount of bleeding              | <b>VERY RARELY.</b> Congestive heart failure (fluid buildup in the lungs because the heart has trouble pumping extra fluid)<br><br><b>VERY RARELY.</b> Lung inflammation |
| Surgery                          | To surgically remove the bleeding tissue              | <b>VERY RARELY.</b> Only in the most serious bleeds                 | <b>VERY RARELY.</b> Risks of general anaesthetic, surgical complications                                                                                                 |

**FINDING (AND TREATING) A GI BLEED:**

To find where a GI bleed is coming from, the following tests can be done. These tests can lead to the treatment of the bleed:

| Procedure                                           | Purpose                                                       | How Often it is Necessary                                      | Possible Adverse Effects or Discomforts                                                                                                                               |
|-----------------------------------------------------|---------------------------------------------------------------|----------------------------------------------------------------|-----------------------------------------------------------------------------------------------------------------------------------------------------------------------|
| Diagnostic Endoscopy                                | To locate the source of the bleeding                          | <b>COMMONLY.</b> For bleeding that is severe                   | <b>COMMONLY.</b> Low blood pressure and drowsiness related to the sedation                                                                                            |
| Therapeutic Endoscopy                               | To try to physically stop the bleeding                        | <b>COMMONLY.</b> Whenever a serious cause of bleeding is found | <b>VERY RARELY.</b> Making the bleeding worse or accidentally making a hole in the stomach                                                                            |
| Angiography                                         | To find the site of bleeding more accurately                  | <b>RARELY.</b> For serious bleeding                            | <b>VERY RARELY.</b> Dye used to find the site of bleeding may cause damage to the kidneys                                                                             |
| Angiography & Embolization (to create a blood clot) | To stop bleeding by creating a blood clot in the blood vessel | <b>RARELY.</b> For serious bleeding                            | <b>VERY RARELY.</b> Dye used to find the site of bleeding may cause damage to the kidneys, or the stomach lining may die from lack of blood supply caused by the clot |

Now that you understand what a GI bleed is and how to find and treat it, we want to know what characteristics of a GI bleed are important to you!

## Patient Important Bleeding Online Interview Guide

### Introduction:

Ask everyone present to briefly introduce themselves.

Thank you for taking the time to participate in an interview that we are conducting as part of the REVISE study.

Before we begin the interview, I am going to review a few things:

### Logistics:

- Today's interview will take approximately 1 hour
- If you need to take a break to use the bathroom or take a call, please let me know and we can pause the interview – please remember to use the mute function
- Please ensure that you are in a quiet space with minimal distractions so that I can hear you clearly.
- As was described in the consent form, we will be audio recording today's discussion, and all information shared today will be anonymized—that is, you will not be identified in association with anything you say.
- You can choose to have your video on or off during the discussion. Having your video turned on is preferable as it will help facilitate discussion and allow for a more natural flow of discussion. However, if you are not comfortable, you may turn off this function. We will not be recording any video.

### About the Interview

- I would like to remind you that your participation in this study is voluntary and you can end your participation in the interview at any time.
- YOU ARE THE EXPERT! There are no right or wrong answers to the questions we have for you. We are interested in learning about your experiences and your perspectives.

### Consent

- As I mentioned over email, we do not need to collect your signed consent for this interview. Before we start the interview I do want to check if you had a chance to read the consent form I sent you? (If no, review consent form). If yes – do you have any questions before we begin?

## Patient Important Bleeding Online Interview Guide

### Introduction to Study:

We'd like to share some slides on-screen with you to introduce you to the REVISE Study and provide you with some background information on why we are conducting this study to prevent gastrointestinal bleeding.

**[ share screen – presentation]**

**[ After presenting GI bleed information (and before the information on tests and treatments), stop the presentation at a slide with a picture of a ventilated ICU patient. ]**

**[ Ask people to unmute and click “show small active speaker” in top right-hand corner ]**

Ask the following questions:

1. What do you think of, and what do you feel when you hear the term “GI bleed”?
2. I'd like to ask you to think of this scenario: You or your family member is critically ill in the ICU on a machine which is helping them to breathe called a ventilator. One day, the doctor says that an upper GI bleed has just started a few hours ago. Some blood is seen in the tube placed in the stomach, but it is not clear exactly where the bleeding is coming from, and so far, no particular treatment is needed.
3. What are your concerns about the GI bleed?

*Probes: the amount of bleeding; location of the bleeding; seeing the bleeding; short-term impacts and long-term impacts of the bleeding; reason for the bleeding; how the patient experiences the bleeding (e.g., discomfort, pain); how serious is the bleeding (in the context of the primary reason for admission).*

Thank you for discussing your feelings and concerns about GI bleeds. We are going to return to the presentation to learn about the different tests and treatments that are used to find and stop GI bleed.

**[ return to presentation ]**

Do you have any questions about the information in the presentation?

- Before we begin the interview questions, I just wanted to describe the context for this research study. As you may know: In the ICU patients are often sedated and not able to take part in discussions about their medical tests and treatment options. This is why we are doing this study - it is important to hear from patients and family members about what things are important when considering different tests and treatments for upper GI bleeding.

## Patient Important Bleeding Online Interview Guide

As we move into the interview questions, I am going to begin recording the audio component of our discussion.

**[ start the recording function on Zoom]**

**[ Moderator to share the slide with the spectrum of tests and treatments on the screen ]**

I am going to share my screen again and put up the slide showing the different tests and treatments that might be used for upper GI bleeding.

**[ share screen with online handout]**

Some of these are more invasive than others. It is possible that a blood transfusion may be required or new drugs might be started to increase low blood pressure that develops due to bleeding. In addition, procedures to find out where the bleeding is coming from may be necessary, which might also involve treating the bleed. There are potential risks and benefits to each of these, which we reviewed earlier.

4. Has anyone had personal experience with a GI bleed?" If yes, please describe your experience.
5. Do you have experience with any of these tests or treatments for a GI bleed or for another medical condition? If yes, please describe your experience.
6. The clinical team works with patients and families to make a management plan. Thinking about the scenario whereby you or your family member is on a breathing machine in the ICU and has developed a GI bleed:
  1. Which of the tests and treatments are you most comfortable with? Why?
  2. Which of the tests and treatments concern you the most? Why?

*Probes: We're interested to know what tests and treatments are most preferred and which are least preferred (how and why they made the decision). For example, if participants list drugs first, ask about drugs and ask if all drugs are viewed the same way and then ask explicitly about the different drugs (i.e. antacids and medications to increase blood pressure). Perceptions of level of invasiveness of the test or treatment, level of discomfort for the patient, effectiveness of the test to locate the bleeding, effectiveness of the treatment to stop the bleeding, balancing possible discomfort or risk (e.g., infection) and possible benefit, drug interactions, location where test or treatment is done (i.e., in another part of the hospital vs. just done in their room), if any chronic health conditions or personal experience influence views on the test or treatment, short-term effects, long-term effects, perception of recovery time, if the test or treatment includes the patient being sedated again or put under anesthetic?*

7. Thinking about the scenario where your family member is critically ill, on a breathing machine in the ICU and has developed a GI bleed. Is there anything the care team could do that would make you more comfortable with these tests and treatments?

## Patient Important Bleeding Online Interview Guide

*Probes: Would the clinical condition of the patient change the information they would want to receive or extent to which they are involved (e.g., if GI bleed is not primary concern or the size of the GI bleed), trust in doctor, relationship with doctor, understanding the different options (doctor took the time to explain them and answer questions), hearing the same things about the options from everyone on the medical team, knowing the treatment is commonly used, treatment is a familiar experience (i.e. IV medications), level of emotion experiencing when making the decision, gut feeling/perceptions, not feeling pressured to make a decision, knowing the numbers about the success of the intervention (i.e. % of patients whose response to this treatment is successful).*

8. What do you want to avoid with these tests and treatments?
9. If you found out if any of these tests or treatments were considered life support (i.e., needed to keep the patient alive or save the patient's life), would that change your concerns? Would it change your comfort level? If so, how?

### Wrap Up Discussion

10. Does anyone have any final thoughts they would like to share with us? (*Is there a "take home" message they would like the research team to capture?*)

### Conclusion:

Thank you everyone for your comments. Once again, your participation today is helping us advance the care of patients in the ICU. I can't stress it enough, that we cannot do this research without you! These are all of the questions I have for you.

Do you have any questions for us? (*e.g., length/format of focus group, what worked well/didn't work well for the virtual format*)

As a thank you for your input and your participation in this focus group, we would also like to give you a gift card. This will be emailed to you. We appreciate that you took the time to talk to us!

11. I just have a few demographic questions to ask you now

**[ complete PIB Interview Tracking Requirements Document ]**



## Patient Important Bleeding Online Focus Group Guide

### Introduction:

Hi everyone and welcome to our session. Thank you for taking the time to join us and take part in this interview/focus group that we are conducting as part of the REVISE Study.

My name is XXXX – I will be the moderator for today’s focus group [explain what a moderator does]

Assisting me today is XXXX – [explain what a notetaker does]

We are both researchers that work in the Department of Critical Care Medicine with Dr. Kirsten Fiest and Dr. Deborah Cook who are leading this work.

### Thanking Participants:

You have been invited to participate in today’s discussion because you have been in the ICU as a patient, or are related to someone who was in the ICU.

Your participation in this study is invaluable! By taking part in this focus group, you are helping us advance the care of patients in the ICU. The results from today’s focus group will be written into a report and published. Your thoughts about bleeding will also be incorporated into a large study about bleeding prevention. We couldn’t do this research without you! You are the experts and we look forward to learning from you.

### Logistics:

Before we get into our discussion, lets cover a few things:

- **TIME:** Today’s focus group will take about 90 minutes. This includes a presentation on gastrointestinal bleeding and a short break.
- **BREAK:** If you need to use the bathroom or take a call, please try and wait until the break to do so. However, if you need to, feel free to step out of the room and remember to mute yourself.
- **QUIET SPACE:** We also ask that everyone please find a quiet space to participate in today’s discussion to minimize distractions so that everyone can hear you clearly. During our discussion, let’s stay unmuted. If there is too much background noise, I’ll ask people to mute themselves.
- **DE-IDENTIFIED INFORMATION:** As you saw in the invitation, we will be audio recording today’s discussion, and all information shared today will be anonymized—that is, nobody will be identified in association with what they said.
- **VIDEO:** You can choose to have your video on or off during the discussion. Having your video turned on is preferable as it will help facilitate a more natural flow to the discussion. However, if you are not comfortable, you may turn off this function. We will not be recording any video. Let’s all make sure we’re in gallery view by choosing “Gallery View” in the top right-hand corner.
- **VOLUNTARY:** Finally, a reminder that your participation in this study is voluntary and you can remove yourself from the study or the focus group at any time. However due to the nature of focus groups, we cannot withdraw what you have already said in the discussion if you choose to remove yourself in the middle of the discussion.

### Consent:

HiREB: 9492

Study Title: Patient Important Gastrointestinal Bleeding in the ICU

PI: Dr. Deborah Cook

Version number/date: Version 2/January 25, 2021

For peer review only - <http://bmjopen.bmj.com/site/about/guidelines.xhtml>



## Patient Important Bleeding Online Focus Group Guide

- Our team sent you the consent form for participation in this study previously. Has everyone had the chance to review the consent form?

***[obtain verbal confirmation from everyone].***

***[ If any participant did not review the consent form, read the oral consent script ]***

- Does anybody have any questions about the consent process?

***If yes, answer question(s) or review consent script; If no, continue below.***

- Does everyone agree to be audio recorded for research purposes?

***If no, wait for participant to withdraw/leave; If yes, begin recording.***

- I will now go around and ask everyone to verbally consent to participate in this study. Do you consent?

### Ground Rules (Adapt for Individual Interview or Focus Group):

- Everything that is shared in today's discussion is confidential.
- We ask that only one person speak at a time; you may be tempted to jump in when someone is talking but please wait until they have finished.
- We want today's discussion to be informal, so there's no need to wait for us to call on you to respond. You do not have to speak in any particular order. In fact, we encourage you to respond directly to the comments that other people make.
- There are no right or wrong answers, only differing viewpoints. You do not have to agree with the views of other people in this group.

Does anyone have any questions before we begin? OK, great, let's start.

### Introductions (Adapt for Individual Interview or Focus Group):

Let's start with introductions. Can everyone please introduce themselves and share your name, where you are joining us from and what your favorite hobby is?

***[ Ask people to mute after introductions ]***

### Introduction to Study:

We'd like to introduce you to the REVISE Study and provide you background information on why we are conducting this study to prevent gastrointestinal bleeding, by presenting a few slides.

***[ share screen – presentation]***

***[ After presenting GI bleed information (and before the information on tests and treatments), stop the presentation at a slide with a picture of a ventilated ICU patient. ]***

***[ Ask people to unmute and click "show small active speaker" in top right-hand corner ]***

## Patient Important Bleeding Online Focus Group Guide

Ask the following questions:

1. What do you think of, and what do you feel when you hear the term “GI bleed”?
2. I'd like to ask you to think of this scenario: You or your family member is critically ill in the ICU on a machine which is helping them to breathe called a ventilator. One day, the doctor says that an upper GI bleed has just started a few hours ago. Some blood is seen in the tube placed in the stomach, but it is not clear exactly where the bleeding is coming from, and so far, no particular treatment is needed.
3. What are your concerns about the GI bleed?

*Probes: the amount of bleeding; location of the bleeding; seeing the bleeding; short-term impacts and long-term impacts of the bleeding; reason for the bleeding; how the patient experiences the bleeding (e.g., discomfort, pain); how serious is the bleeding (in the context of the primary reason for admission).*

Thank you for discussing your feelings and concerns about GI bleeds. We are going to return to the presentation to learn about the different tests and treatments that are used to find and stop GI bleed.

**[ return to presentation ]**

Do you have any questions on the information that was just presented to you?

We will now give you 5 minutes to reflect on what was just discussed. We sent you a handout earlier that summarizes all of the ways to find and stop a GI bleed in the ICU. Please take a moment to go over the handout and imagine that you or a loved one has a GI bleed in the ICU. Using a pen and paper jot down your initial thoughts on the handout:

**[ Moderator to share the slide with the spectrum of tests and treatments on the screen ]**

I'd like to ask everyone to stay unmuted and click “Gallery View” in the top right-hand corner so that we can all see and hear each other.

4. Has anyone had personal experience with a GI bleed?” If yes, please describe your experience.
5. Do you have experience with any of these tests or treatments for a GI bleed or for another medical condition? If yes, please describe your experience.
6. The clinical team works with patients and families to make a management plan. Thinking about the scenario whereby you or your family member is on a breathing machine in the ICU and has developed a GI bleed:
  1. Which of the tests and treatments are you most comfortable with? Why?
  2. Which of the tests and treatments concern you the most? Why?

*Probes: We're interested to know what tests and treatments are most preferred and which are least preferred (how and why they made the decision). For example, if participants list drugs first, ask about drugs and ask if all drugs are viewed the same way and then ask explicitly about the different drugs (i.e. antacids and medications to increase blood pressure). Perceptions of level of invasiveness of the test or treatment, level of discomfort for the patient, effectiveness of the test to locate the bleeding,*

## Patient Important Bleeding Online Focus Group Guide

effectiveness of the treatment to stop the bleeding, balancing possible discomfort or risk (e.g., infection) and possible benefit, drug interactions, location where test or treatment is done (i.e., in another part of the hospital vs. just done in their room), if any chronic health conditions or personal experience influence views on the test or treatment, short-term effects, long-term effects, perception of recovery time, if the test or treatment includes the patient being sedated again or put under anesthetic?

**[ 10-minute break ]**

**[ Reference to handout and tests/treatments ]**

7. Thinking about the scenario where your family member is critically ill, on a breathing machine in the ICU and has developed a GI bleed. Is there anything the care team could do that would make you more comfortable with these tests and treatments?

*Probes: Would the clinical condition of the patient change the information they would want to receive or extent to which they are involved (e.g., if GI bleed is not primary concern or the size of the GI bleed), trust in doctor, relationship with doctor, understanding the different options (doctor took the time to explain them and answer questions), hearing the same things about the options from everyone on the medical team, knowing the treatment is commonly used, treatment is a familiar experience (i.e. IV medications), level of emotion experiencing when making the decision, gut feeling/perceptions, not feeling pressured to make a decision, knowing the numbers about the success of the intervention (i.e. % of patients whose response to this treatment is successful).*

8. What do you want to avoid with these tests and treatments?
9. If you found out if any of these tests or treatments were considered life support (i.e., needed to keep the patient alive or save the patient's life), would that change your concerns? Would it change your comfort level? If so, how?

*Wrap Up Discussion*

10. Does anyone have any final thoughts they would like to share with us? (*Is there a "take home" message they would like the research team to capture?*)

**Conclusion:**

Thank you everyone for your comments. Once again, your participation today is helping us advance the care of patients in the ICU. I can't stress it enough, that we cannot do this research without you! These are all of the questions I have for you.

Do you have any questions for us? (e.g., length/format of focus group, what worked well/didn't work well for the virtual format)

As a thank you for your input and your participation in this focus group, we would also like to give you a gift card. This will be emailed to you. We appreciate that you took the time to talk to us!

# BMJ Open

## What counts as Patient-Important Upper Gastrointestinal Bleeding in the ICU?:

### A Mixed-Methods Study Protocol of Patient and Family Perspectives

|                               |                                                                                                                                                                                                                                                                                                                                                                                                                                                                                                                                                                                                                                                                                                                                                                                                                                                                                                                                                                                                                                                                                                                                                                                                                                                                                                                                                                                                                                                                                                                                                                                                                                                                                                                                                                                                                                                                                                                                                                                                                                                                           |
|-------------------------------|---------------------------------------------------------------------------------------------------------------------------------------------------------------------------------------------------------------------------------------------------------------------------------------------------------------------------------------------------------------------------------------------------------------------------------------------------------------------------------------------------------------------------------------------------------------------------------------------------------------------------------------------------------------------------------------------------------------------------------------------------------------------------------------------------------------------------------------------------------------------------------------------------------------------------------------------------------------------------------------------------------------------------------------------------------------------------------------------------------------------------------------------------------------------------------------------------------------------------------------------------------------------------------------------------------------------------------------------------------------------------------------------------------------------------------------------------------------------------------------------------------------------------------------------------------------------------------------------------------------------------------------------------------------------------------------------------------------------------------------------------------------------------------------------------------------------------------------------------------------------------------------------------------------------------------------------------------------------------------------------------------------------------------------------------------------------------|
| Journal:                      | <i>BMJ Open</i>                                                                                                                                                                                                                                                                                                                                                                                                                                                                                                                                                                                                                                                                                                                                                                                                                                                                                                                                                                                                                                                                                                                                                                                                                                                                                                                                                                                                                                                                                                                                                                                                                                                                                                                                                                                                                                                                                                                                                                                                                                                           |
| Manuscript ID                 | bmjopen-2022-070966.R1                                                                                                                                                                                                                                                                                                                                                                                                                                                                                                                                                                                                                                                                                                                                                                                                                                                                                                                                                                                                                                                                                                                                                                                                                                                                                                                                                                                                                                                                                                                                                                                                                                                                                                                                                                                                                                                                                                                                                                                                                                                    |
| Article Type:                 | Protocol                                                                                                                                                                                                                                                                                                                                                                                                                                                                                                                                                                                                                                                                                                                                                                                                                                                                                                                                                                                                                                                                                                                                                                                                                                                                                                                                                                                                                                                                                                                                                                                                                                                                                                                                                                                                                                                                                                                                                                                                                                                                  |
| Date Submitted by the Author: | 12-Apr-2023                                                                                                                                                                                                                                                                                                                                                                                                                                                                                                                                                                                                                                                                                                                                                                                                                                                                                                                                                                                                                                                                                                                                                                                                                                                                                                                                                                                                                                                                                                                                                                                                                                                                                                                                                                                                                                                                                                                                                                                                                                                               |
| Complete List of Authors:     | <p>Cook, Deborah; McMaster University<br/>         Swinton, Marilyn; McMaster University<br/>         Krewulak, Karla; University of Calgary Cumming School of Medicine, Critical Care Medicine<br/>         Fiest, Kirsten; University of Calgary Cumming School of Medicine, Critical Care Medicine<br/>         Dionne, Joanna; McMaster University, Medicine<br/>         Debigare, Sylvie; Canadian Critical Care Trials Group, Patient and Family Partnership Committee<br/>         Guyatt, Gordon; McMaster University, Clinical Epidemiology and Biostatistics<br/>         Taneja, Shipra; McMaster University, Family Medicine<br/>         Alhazzani, Waleed; McMaster University,<br/>         Burns, Karen; University of Toronto, Interdepartmental Division of Critical Care Medicine; Unity Health Toronto, Department of Critical Care Medicine<br/>         Marshall, John; University of Toronto, Department of Surgery<br/>         Muscedere, John; Kingston General Hospital,<br/>         Gouskos, Audrey; Patient and Family Advisory Committee and Steering Committee Representative<br/>         Finfer, Simon; The George Institute for Global Health,<br/>         Deane, Adam M; University of Melbourne, Department of Critical Care, Melbourne Medical School<br/>         Myburgh, John; University of New South Wales, The George Institute for Global Health<br/>         Rochweg, Bram; McMaster University, Medicine (Critical Care)<br/>         Ball, Ian; London Health Sciences Centre, Medicine<br/>         Mele, Tina; University of Western Ontario, ; University of Western Ontario Schulich School of Medicine and Dentistry,<br/>         Niven, Daniel; University of Calgary, Critical Care Medicine<br/>         English, Shane; Ottawa Hospital Research Institute, Clinical Epidemiology Program; University of Ottawa, Division of Critical Care, Department of Medicine<br/>         Verhovsek, Madeleine; McMaster University, Medicine<br/>         Vanstone, Meredith; McMaster University, Family Medicine</p> |
| <b>Primary Subject            | Intensive care                                                                                                                                                                                                                                                                                                                                                                                                                                                                                                                                                                                                                                                                                                                                                                                                                                                                                                                                                                                                                                                                                                                                                                                                                                                                                                                                                                                                                                                                                                                                                                                                                                                                                                                                                                                                                                                                                                                                                                                                                                                            |

1  
2  
3  
4  
5  
6  
7  
8  
9  
10  
11  
12  
13  
14  
15  
16  
17  
18  
19  
20  
21  
22  
23  
24  
25  
26  
27  
28  
29  
30  
31  
32  
33  
34  
35  
36  
37  
38  
39  
40  
41  
42  
43  
44  
45  
46  
47  
48  
49  
50  
51  
52  
53  
54  
55  
56  
57  
58  
59  
60

|                            |                                                                                                                                                              |
|----------------------------|--------------------------------------------------------------------------------------------------------------------------------------------------------------|
| Heading                    |                                                                                                                                                              |
| Secondary Subject Heading: | Patient-centred medicine                                                                                                                                     |
| Keywords:                  | INTENSIVE & CRITICAL CARE, Protocols & guidelines < HEALTH SERVICES ADMINISTRATION & MANAGEMENT, Adult intensive & critical care < INTENSIVE & CRITICAL CARE |
|                            |                                                                                                                                                              |

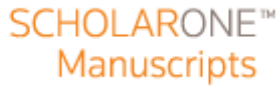

## What counts as Patient-Important Upper Gastrointestinal Bleeding in the ICU?:

### A Mixed-Methods Study Protocol of Patient and Family Perspectives

Deborah Cook<sup>1,2,3</sup>, Marilyn Swinton<sup>4</sup>, Karla Krewulak<sup>5</sup>, Kirsten Fiest<sup>5</sup>, Joanna C. Dionne<sup>1,6</sup>, Sylvie Debigare<sup>7</sup>, Gordon Guyatt<sup>1,2</sup>, Shipra Taneja<sup>4</sup>, Waleed Alhazzani<sup>1,2,3</sup>, Karen E. A. Burns<sup>15</sup>, John C Marshall<sup>16</sup>, John G Muscedere<sup>17</sup>, Audrey Gouskos<sup>18</sup>, Simon Finfer<sup>10,11</sup>, Adam Deane<sup>14</sup>, John A Myburgh<sup>10</sup>, Bram Rochweg<sup>1,2,6</sup>, Ian Ball<sup>13</sup>, Tina Mele<sup>12</sup>, Daniel J. Niven<sup>5</sup>, Shane W. English<sup>8,9</sup>, Madeleine Verhovsek<sup>1</sup>, Meredith G. Vanstone<sup>4</sup>

For the Canadian Critical Care Trials Group

1. Department of Medicine, Faculty of Health Sciences, McMaster University, Hamilton, Ontario, Canada
2. Department of Health Research Methods, Evidence, and Impact, Faculty of Health Sciences, McMaster University, Hamilton, Ontario, Canada
3. Department of Critical Care, St. Joseph's Healthcare Hamilton
4. Department of Family Medicine, Faculty of Health Sciences, McMaster University, Hamilton, Ontario, Canada
5. Department of Critical Care Medicine, University of Calgary, Calgary, Alberta, Canada
6. Department of Critical Care, Hamilton Health Sciences, Hamilton, Ontario, Canada
7. Patient and Family Partnership Committee, Canadian Clinical Care Trials Group
8. Department of Medicine (Critical Care), University of Ottawa, Ottawa Ontario Canada
9. Clinical Epidemiology Program, Ottawa Hospital Research Institute, Ottawa Ontario Canada
10. Critical Care Division, The George Institute for Global Health, University of New South Wales, Sydney, NSW, Australia
11. The George Institute for Global Health, School of Public Health, Imperial College London, London, England
12. Department of Surgery and Critical Care Medicine, Western University, London, Ontario, Canada
13. Department of Medicine and Department of Epidemiology and Biostatistics, Western University, London, Ontario, Canada.
14. Department of Critical Care, University of Melbourne, Melbourne Medical School, Victoria, Australia
15. Interdepartmental Division of Critical Care, Department of Medicine, University of Toronto, Toronto, Canada
16. Departments of Surgery and Critical Care Medicine, Unity Health Toronto, University of Toronto, Canada
17. Department of Critical Care Medicine, Queens University, Kingston Health Sciences Center
18. Patient and Family Advisory Committee and Steering Committee representative, FAST-NAWC trial, Toronto, Canada

Correspondence: DJ Cook, Departments of Medicine & Health Research Methods, Evidence and Impact, McMaster University Health Sciences Center, Room 2C11, 1200 Main Street West, Hamilton, Ontario, Canada, L8N 3Z5; debcook@mcmaster.ca, 905-525-9140 x22160

**Funding:** This work was supported by the Hamilton Academy of Health Sciences Organization Grant #HAH-22-009

**Key Words:** Critical care, gastrointestinal bleeding, patient engagement, patient-oriented research, protocol

1  
2  
3 56  
4 57 **Abstract**  
5 58

6 59 **Introduction:** Clinically important upper gastrointestinal bleeding is conventionally defined as bleeding  
7 60 accompanied by hemodynamic changes, requiring red blood cell transfusions or other invasive  
8 61 interventions. However, it is unclear if this clinical definition reflects patient values and preferences. This  
9 62 protocol describes a study to elicit views from patients and families regarding features, tests, and  
10 63 treatments for upper gastrointestinal bleeding that are important to them.  
11 64

12 65 **Methods and analysis:** This is a sequential mixed-methods qualitative-dominant multi-center study with  
13 66 an instrument-building aim. We developed orientation tools and educational materials in partnership with  
14 67 patients and family members, including a slide deck and executive summary. We will invite ICU survivors  
15 68 and family members of former ICU patients to participate. Following a virtual interactive presentation,  
16 69 participants will share their perspectives in an interview or focus group. Qualitative data will be analyzed  
17 70 using inductive qualitative content analysis, wherein codes will be derived directly from the data rather  
18 71 than using preconceived categories. Concurrent data collection and analysis will occur. Quantitative data  
19 72 will include self-reported demographic characteristics. This study will synthesize the values and  
20 73 perspectives of patients and family members to create a new trial outcome for a randomized trial of stress  
21 74 ulcer prophylaxis. This study is planned for May 2022 – August 2023. The pilot work was completed in  
22 75 Spring 2021.  
23 76

24 77 **Ethics & Dissemination:** This study has ethics approval from McMaster University and the University of  
25 78 Calgary. Findings will be disseminated via manuscript and through incorporation as a secondary trial  
26 79 outcome on stress ulcer prophylaxis.  
27 80

28 81 **Registration:** Clinicaltrials.gov #NCT05506150  
29 82  
30  
31  
32  
33  
34  
35  
36  
37  
38  
39  
40  
41  
42  
43  
44  
45  
46  
47  
48  
49  
50  
51  
52  
53  
54  
55  
56  
57  
58  
59  
60

1  
2  
3 83 **Article Summary**

4 84  
5 85 **Strengths & Limitations of This Study**

- 6 86 • The protocol describes a rigorous process for building a measure which is responsive to patient  
7 87 preferences  
8 88 • The protocol was developed in partnership with patient and family members  
9 89 • Proposed participants are those with personal or caregiving experience of the adult ICU.  
10 90 • Patient partners may differ in demographic and experiential traits from the general ICU  
11 91 population.  
12 92

13  
14 93 **Correspondence:** DJ Cook, Department of Critical Care, St Joseph's Healthcare Hamilton, Departments  
15 94 of Medicine & Health Research Methods, Evidence, and Impact, McMaster University, Room 2C11, 1200  
16 95 Main Street West, Hamilton, Ontario, Canada, L8N 3Z5; debcook@mcmaster.ca

17 96 **Abstract Word Count = 245**

18  
19 97 **Manuscript Word Count = 4436**  
20  
21 98  
22  
23  
24  
25  
26  
27  
28  
29  
30  
31  
32  
33  
34  
35  
36  
37  
38  
39  
40  
41  
42  
43  
44  
45  
46  
47  
48  
49  
50  
51  
52  
53  
54  
55  
56  
57  
58  
59  
60



## 100 Introduction

101 Patient and family engagement occurs through an active partnership forged among patients, families,  
102 clinicians and researchers to improve both health and care. (1) Through their lived experience, patients  
103 and families provide a unique perspective on various aspects of research, including investigational  
104 priorities. (2) Their engagement can lead to better outcomes and improved satisfaction for patients and  
105 families, and cost savings for the healthcare system. (3) For patients in the intensive care unit (ICU) who  
106 are usually unable to participate in their own care due to the severity of their illness, partnering with ICU  
107 survivors and family members is garnering increased attention. (4, 5, 6)

109 Ethically and scientifically compelling, patient involvement in critical care research can build on a  
110 proliferation of strategies for meaningful involvement of patient partners in health research to help ensure  
111 that the study outcomes are relevant and meaningful to future patients. (6, 7, 8, 9, 10) In service of this  
112 tenet, there is a need to create a measure of upper gastrointestinal bleeding that is important to patients  
113 and their families. In critically ill patients, minor bleeding is extremely common, but major bleeding is rare,  
114 as documented using an ICU-specific bleeding instrument capturing bleeding from any body site. (11)  
115 Bleeding from the upper gastrointestinal tract is a well-known complication of critical illness. Early  
116 investigations in the ICU setting examining the epidemiology, risk factors and consequences of upper  
117 gastrointestinal bleeding often use an outcome of 'clinically important bleeding' which was developed  
118 from the practitioner's perspective. The criteria were based on aberrant physiology and associated  
119 required interventions, (12, 13) modified to distinctly incorporate vasopressors. (14, 15) Clinically  
120 important upper gastrointestinal bleeding is defined as overt bleeding *in the absence of other causes* with  
121 one of the following features: 1) spontaneous decrease in systolic (SBP) or diastolic (DBP) blood  
122 pressure of >20 mmHg within 24 hours of upper GI bleeding, 2) an orthostatic increase in HR >20  
123 beats/minute and a decrease in SBP of >10 mmHg, 3) initiation of vasopressors or increase in their  
124 infusion rate of  $\geq 20\%$ , 4) a decrease in hemoglobin of >2 g/dl (20 g/l) in 24 hours, or 5) transfusion of >2  
125 units of red blood cells within 24 hours of bleeding. While this definition has been used in several large  
126 studies, it does not take into account the views of patients and/or their families.

128 Other definitions and classifications of bleeding from any site are available, such as those of the World  
129 Health Organization (16) and International Society of Hemostasis and Thrombosis (17) and the HEME  
130 tool that was specifically developed to classify bleeding in critically ill patients. (11) However, none of  
131 these definitions or tools are focused on bleeding from the gastrointestinal tract, and none have been  
132 developed with patient and family input. Incorporating patient and family perspectives is crucial to ensure  
133 that bleeding research not only acknowledges, but intentionally incorporates patient preferences and  
134 experiences – whether they are aware of, or personally experienced or observed this type of bleeding.

136 Aligned with the International Association of Public Participation principles, (18) we will collaborate with  
137 ICU survivors and family members in research with the dual purpose of learning from their experiences  
138 and integrating their perspectives on which aspects of upper gastrointestinal bleeding during critical  
139 illness are most important to them. We understand 'patient important bleeding events' to be those that  
140 would, in the absence of any other benefits, lead patients to consider receiving an intervention to treat the  
141 bleed, or are associated with appreciable harm, distress, burden, or personal cost. (17, 19) However,  
142 some aspects of bleeding that concern clinicians may not concern patients in the ICU who are generally  
143 unaware of adverse events due to their impaired consciousness. For example, receipt of inotropes or  
144 vasopressors may not be as meaningful to ICU patients as to clinicians, as critically ill patients are  
145 typically unaware that the infusion represents a form of advanced life support. By contrast, transfusions  
146 may be more concerning to patients than clinicians, especially if they are not fully informed of  
147 contemporary blood product safety. (20)

149 In critical care medicine, there is a dearth of research directly informed by legitimate public engagement,  
150 representing untapped potential. (6) This Patient Important Bleeding Study will engage patients and  
151 families to create a definition of what matters most to them regarding tests and treatments used for upper  
152 gastrointestinal bleeding. (21) Results will directly inform the definition of patient-important bleeding which  
153 is a secondary outcome in an ongoing international trial comparing stress ulcer prophylaxis with  
154 pantoprazole versus placebo - the Re-Evaluating the Inhibition of Stress Erosions (REVISE) Trial - the  
155 primary outcome of which is clinically important upper gastrointestinal bleeding. (22)

156

## 157 **Objective, Question and Hypothesis**

158 The overall objective of this study is to elicit the views of patients and families regarding features, tests  
159 and treatment for upper gastrointestinal bleeding that are important to them. The research question is  
160 'What are the most concerning tests and treatments to patients and families in the event of an upper  
161 gastrointestinal bleed that occurs in the ICU?' Our hypothesis is that patients and families will be  
162 concerned about some bleeding tests and treatments (e.g., invasive procedures), while they will be  
163 comfortable with others (e.g., vasopressor infusion into a pre-existing intravenous access), even if this  
164 represents increased treatment intensity. We also hypothesize that regardless of their views regarding  
165 particular tests or treatments, they will be concerned if bleeding results in a longer hospital stay or if a  
166 patient dies with or from bleeding.

## 168 **Design**

169 This is a sequential mixed-methods, qualitative-dominant, multi-center study with an instrument-building  
170 aim. (23, 24) In this protocol manuscript, we describe the collection and analysis of qualitative data used  
171 to build an instrument, operationalized as a multicomponent definition of patient-important bleeding. This  
172 instrument will be used to collect quantitative data for an outcome in patients enrolled in an international  
173 RCT of stress ulcer prophylaxis (Re-Evaluating the Inhibition of Stress Erosions (REVERSE) Trial). Pilot  
174 work began in 2021 and trial completion is anticipated in August 2023.

## 176 **Participants**

177 Adult patients  $\geq 18$  years of age who were admitted to ICU  $\geq 72$  hours and family members of adult ICU  
178 patients in ICU for  $\geq 72$  hours (unlinked), regardless of bleeding experience, ICU survival, health literacy  
179 or professional health care training. Eligible patient participants must have been discharged from hospital  
180 after their episode of critical illness. Individuals will be excluded if they have prohibitive communication  
181 challenges (e.g., serious psychological or psychiatric illness that prevents the individual from consenting  
182 to participate in research or providing their perspective, insufficient ability to read and speak English or  
183 other languages for which a research staff or family interpreter exists). All experiential data will be self-  
184 reported, consistent with best practices in qualitative research. To avoid confounding by previous  
185 participation in related research, we will exclude patients enrolled in REVERSE and family members of  
186 patients enrolled in REVERSE.

187  
188 We are purposeful in our decision not to make personal experience with upper gastrointestinal bleeding  
189 an inclusion criterion; most patients and families who encounter this type of bleeding do so for the first  
190 time and will make judgments about the importance of that outcome from that perspective. By recruiting  
191 participants who have not experienced or witnessed bleeding, but who imagine themselves in this  
192 situation, we will identify a participant population most similar to patients and families who will encounter  
193 this clinical scenario. However, personal experience with gastrointestinal bleeding from a patient's  
194 perspective, and bearing witness to gastrointestinal bleeding from a family perspective is not an exclusion  
195 criterion, to reflect a range of perspectives for this study.

## 197 **Sampling Strategies**

198 Multiple perspectives will be sought by sampling ICU survivors and family members of critically ill patients  
199 with diverse demographics and life experiences across several jurisdictions. Qualitative research uses  
200 non-probabilistic sampling approaches to obtain information-rich and relevant perspectives that respond  
201 to the research question. (25, 26) We will use *criterion sampling* to identify possible participants who  
202 satisfy our inclusion and exclusion criteria. We will use *convenience sampling* based on contacts of our  
203 investigative clinical team. We will use *chain referral (snowball) sampling* to identify other possible  
204 participants working as hospital-based or research-associated patient or family partners. The initial  
205 sample will use a maximum variation approach so that analysis of preliminary data may identify relevant  
206 experiential or demographic traits which should be explored with further criterion sampling.

207  
208 To invite participants, we will engage pre-existing patient and family partners involved in the Patient and  
209 Community Engagement Research (PaCER) group, seeking contact using existing mailing lists and social  
210 media groups, including those of the Alberta SPOR (Strategy for Patient-Oriented Research) Support  
211 Unit. We will use similar strategies to invite potential participants associated with the Canadian Critical

1  
2  
3 212 Care Trials Group (CCCTG) Patient and Family Partnership Committee. (27) In Kingston, London,  
4 213 Toronto, Ottawa and Hamilton, our team of clinical investigators will email potential participants drawn  
5 214 from existing patient and family partners who are affiliated with their healthcare organizations or studies.  
6 215 The invitational emails will contain information about the study and ask potential participants to contact  
7 216 the investigators if interested.

8 217  
9 218 We created an infographic to depict the study methods to share with potential participants, particularly  
10 219 those who are already research partners in other studies [Figure 1].  
11 220

### 221 **Sample Size**

12 222 The sample size projection is based on our estimate that approximately 40-50 individual participants will  
13 223 be needed to reach data saturation. This method of assessing sufficiency of qualitative data requires  
14 224 periodic assessment by multiple individuals who reach consensus through discussion on whether existing  
15 225 data adequately answers the research question and allows the researchers to offer a consistent  
16 226 explanation for all relevant perspectives. (28) The final sample size will be confirmed as data collection  
17 227 progresses, but the theory of information power indicates we will likely need a large sample due to the  
18 228 heterogeneity of experiences, relatively little direct experience with the phenomenon of interest, and the  
19 229 lack of an underpinning explanatory theory to explain what aspects of upper gastrointestinal bleeding are  
20 230 likely to be meaningful to patients and families. (29) Data saturation will be assessed periodically by 5  
21 231 investigators through a review of transcripts and coding reports, and audit trail examination; a description  
22 232 of this process will be included in the final manuscript. Feasibility of enrolment will be met when at least  
23 233 15 patients and at least 15 family members are recruited, with representation from several regions, strong  
24 234 representation from each decision-maker (patient, family), and at least 80% participation for invited  
25 235 individuals.  
26 236

### 237 **Preparatory Work**

28 238 In preparation for this study, in Calgary, we developed the orientation and education tools, refined with  
29 239 input from a patient partner, family partner, bedside ICU nurse, and 3 research staff not involved in the  
30 240 project. In Hamilton, informal in-person discussions with 8 ICU patients who experienced gastrointestinal  
31 241 bleeding helped to plan the scope of questions for the interview and focus group guide. A mock interview  
32 242 with a patient partner and a 5-person mock focus group in Calgary informed the content, order and pacing  
33 243 of the questions, as well as the degree of detail and terminology.  
34 244

### 35 245 **Orientation and Education Tools**

36 246 Informed input from patients and families requires a basic understanding of the various presentations of  
37 247 upper gastrointestinal bleeding, possible physiologic changes, diagnostic tests, and therapeutic  
38 248 interventions. In partnership with patients and family members, we developed a slide deck containing  
39 249 approximately 20 images of upper gastrointestinal bleeding, tests and treatments as a companion to the  
40 250 verbal presentation that will orient participants preceding each interview or focus group. Each test and  
41 251 treatment are described in terms of how commonly it is used, its purpose, and possible discomforts or  
42 252 side-effects. We also created a 2-page written summary describing upper gastrointestinal bleeding, tests  
43 253 and treatments in text directed at grade 8 reading level. Thus, we will use written visual and oral  
44 254 approaches to depict and discuss the phenomena tailored to a lay audience, prior to the interviews and  
45 255 focus groups.  
46 256

### 47 257 **Pilot Testing of Education and Orientation Tools**

48 258 Before finalizing the written summary and slide deck, we obtained unstructured feedback until no new  
49 259 feasible ideas for improvement were obtained. From a pre-existing group of patient and family partners  
50 260 affiliated with the PaCER group, suggestions from 2 patients and 2 family members were captured with  
51 261 typed notes, coded, and anonymized at source. [Appendix Text 1].  
52 262

### 53 263 **Interview and Focus Group Guide Development**

54 264 Employing both interviews and focus groups allows triangulation of data collection methods,(30) we  
55 265 developed a 4-page interview and focus group guide using open-ended questions to elicit patient and  
56 266 family views of what matters most about this complication of critical illness. We started with in-person and  
57 267 e-discussions amongst the investigative team. We partnered with one former ICU patient associated with

1  
2  
3 268 the PaCER group and one family advisor associated with the CCCTG Patient and Family Partnership  
4 269 Committee. While the guide focuses on asking questions about how participants evaluate particular tests  
5 270 and treatments, it also includes open-ended questions about what aspects or consequences of upper  
6 271 gastrointestinal bleeding matter most to participants. We anticipate that participants may raise concerns  
7 272 about bleeding-associated morbidity and mortality here (e.g., death is likely to be identified as a patient-  
8 273 important outcome if it occurred due to bleeding).  
9 274

### 275 **Pilot Testing of Interview and Focus Group Guides**

11 276 We elicited feedback on the clarity, comprehensiveness, and redundancy of the questions and prompts in  
12 277 the draft interview and focus group guides, modifying them per suggestions. This was achieved by a pilot  
13 278 interview with 1 former ICU patient and a pilot focus group of 5 family members in Calgary and Hamilton  
14 279 (6 persons in total). Quantitative descriptors of pilot participants were anonymized and entered in an  
15 280 Excel® v.16.6 database [Microsoft Corporation, Redmond, Washington]. Feedback from the pilot  
16 281 interview and focus group was captured with typed notes, anonymized at source for future use, but was  
17 282 neither audiotaped nor transcribed. [Appendix Text 2].  
18 283

### 19 284 **Interviewer Training**

20 285 Two experienced qualitative interviewers in Hamilton and Calgary received training to harmonize their  
21 286 interviewing approach. We ensured calibration by having them use a common guide, both attending  
22 287 interviews and focus groups in the pilot phase, and discussing data collection at team meetings.  
23 288

### 24 289 **Main Study**

#### 25 290 **Qualitative Data Collection: Individual Interviews and Focus Groups**

26 291 We will conduct individual interviews (45-60 minutes in duration) and focus groups (90-120 minutes in  
27 292 duration) with former patients or family members associated with healthcare institutions in Hamilton,  
28 293 Kingston, London, Ottawa, Toronto or Calgary. Focus groups will be comprised of 2-5 patients or family  
29 294 members. All participants will receive a \$25 gift card to thank them for their time.  
30 295

31 296 One of two interviewers and one field note taker not involved in the REVSE trial will be present at each  
32 297 interview or focus group, along with the participant(s) and the investigator who will give the presentation.  
33 298 Following introductions, the interviewer will affirm consent and refer to the pre-circulated 2-page  
34 299 document summarizing tests and treatments. An orienting interactive slide presentation will follow,  
35 300 encouraging questions or clarifications on the content, after which the presenter will leave the  
36 301 videoconference. Although discussion about costs to the healthcare system may arise, we will clarify that  
37 302 our focus is not the cost of tests or treatments, or the economic consequences of bleeding.  
38 303

39 304 The interview will be audio-recorded and transcribed verbatim. The field note taker will record  
40 305 observations during and after each interview or focus group. These notes will record non-verbal  
41 306 communication (e.g., nodding in agreement with a verbal comment of another participant), reflect on  
42 307 process issues, and offer summaries of key ideas shared during the data collection session. At the end of  
43 308 each interview or focus group, we will ask participants to reflect on their research experience, which will  
44 309 also be incorporated into typed field notes, coded, and anonymized at source.  
45 310

#### 46 311 **Quantitative Data Collection**

47 312 We will obtain quantitative data describing participants including age, sex, race, city of residence, and any  
48 313 professional healthcare role. About the patient, we will collect the hospital name, reason for the patient's  
49 314 ICU admission, and (if known to participant) whether the patient had experienced gastrointestinal  
50 315 bleeding in the ICU. We recognize that participants may not know if upper gastrointestinal bleeding  
51 316 developed in the ICU. Given that experiencing or witnessing a bleed may inform participant perspectives  
52 317 on bleeding, documenting a bleeding event is only relevant *if the participant was aware of the bleeding*.  
53 318 For this reason, we will not objectively verify whether the patient developed bleeding. For family  
54 319 members, we will document their relationship to the patient (e.g., child, partner, sibling, friend), and  
55 320 corresponding information as above.  
56 321

### 57 322 **Analyses**

#### 58 323 **Qualitative Analyses**



1  
2  
3 324 De-identified transcripts will be imported into NVivo® [QSR International, Melbourne, Australia] for data  
4 325 management and analysis. We will conduct a qualitative descriptive analysis, aiming to create a  
5 326 descriptive summary of study findings, organized and presented in the language of the participants with  
6 327 minimal theoretical interpretation. (31) Data will be analyzed using qualitative content analysis, whereby  
7 328 codes are derived directly from the data rather than using preconceived categories. (32) As data  
8 329 collection proceeds, new information and insights will be incorporated into data collection and analysis,  
9 330 making the processes reflexive and interactive.

10 331  
11 332 Five investigators will participate in the initial (open) coding, reading data to form a comprehensive list of  
12 333 codes. Specifically, we will use open coding, group discussion and reconciliation, to identify categories  
13 334 reflecting patient-important considerations (e.g., *familiarity*, *safety*, *effectiveness*, *invasiveness*, etc.) on  
14 335 which we will center additional data collection and coding (focused coding). These considerations will be  
15 336 derived inductively from participant comments on bleeding characteristics, tests, and treatments that  
16 337 matter most to them. For example, the *familiarity* of a test, or the *effectiveness* of the treatment might be  
17 338 identified as key patient-important considerations.

18 339  
19 340 The next round of coding will involve deductively matching each consideration to participants' expressions  
20 341 about each test or treatment. This focused framework coding will generate data about how each test or  
21 342 treatment is understood in relation to the general patient-important considerations. For example, at this  
22 343 stage we will be able to describe how participants perceive the *safety* of endoscopy as a test, and how  
23 344 they perceive the *invasiveness* of angio-embolization as treatment.

24 345  
25 346 In the next round of coding, investigators will work to further categorize each test or treatment according  
26 347 to each consideration. For example, to what degree are participants concerned about the *effectiveness* of  
27 348 acid suppression? In this stage, we will also describe how consistently participants comment on each test  
28 349 or treatment in light of these considerations and assess the degree to which participants have convergent  
29 350 or divergent views.

30 351  
31 352 Preliminary results will be shared with the broader group of interdisciplinary collaborators for further  
32 353 discussion (investigator triangulation). Results will also be shared with 2-4 patients and family participants  
33 354 via videoconference meeting to inquire about whether the findings resonate with their perspectives,  
34 355 exploring the credibility of the findings (member checking). (33)

### 35 356 36 357 **Quantitative Analyses**

37 358 Data describing patient and family member characteristics, as described in the Quantitative Data  
38 359 Collection section, will be analyzed using descriptive statistics, measures of central tendency and  
39 360 dispersion, and proportions.

### 40 361 41 362 **Data Integration**

42 363 The current study is designed with an instrument-building aim. Qualitative data will be translated into a  
43 364 measure for use as a secondary outcome of the ongoing REVISE trial. The planned translation of  
44 365 qualitative data into a secondary trial outcome will involve the creation of a binary variable for "patient-  
45 366 important bleeding". The qualitative data analysis will inform a list of tests, treatments, or clinical  
46 367 outcomes which if experienced, constitute patient-important bleeding. If REVISE trial participants have  
47 368 had bleeding which led to the use of one of those tests or treatments, they will be deemed to have  
48 369 experienced patient-important gastrointestinal bleeding. In the absence of bleeding or absence of  
49 370 bleeding leading to test or treatment of concern to patients or family members, REVISE trial participants  
50 371 will be classified as not to have experienced patient-important gastrointestinal bleeding. If REVISE trial  
51 372 participants have had bleeding which directly resulted in death, and participants state that death this is  
52 373 deemed to be a patient-important outcome, they will be deemed to have experienced patient-important  
53 374 gastrointestinal bleeding.

### 54 375 55 376 **How will the Results be Used?**

56 377 The findings from this study will have several implications. From the *research* perspective, results will be  
57 378 used to refine a novel secondary outcome of the ongoing REVISE trial, ensuring that the evidence  
58 379 produced by the trial will be patient and family-centered. The design could serve as a template for clinical

1  
2  
3 380 research methodologists interested in meaningful citizen engagement in research. This new outcome will  
4 381 be useful for investigators recognizing the importance of incorporating patient and family perspectives  
5 382 when designing studies on the incidence, risk factors, consequences, prevention, and management of  
6 383 upper gastrointestinal bleeding in the ICU.

7 384  
8 385 Bleeding rates in the literature may be more conditional on different bleeding definitions and assessment  
9 386 methods than on actual bleeding. (34) Unclear and variable gastrointestinal bleeding definitions across  
10 387 studies over decades make inferences challenging when summarizing studies about gastrointestinal  
11 388 bleeding rates, risk factors, and consequences. This study will inform the interpretation of future  
12 389 randomized trials, systematic reviews, network meta-analyses (35) and practice guidelines with an  
13 390 emphasis on the values of patients and families.

14 391  
15 392 From the *practice* perspective, the results of this study will inform clinicians about how to better support  
16 393 patients and families to explain the characteristics of diagnostic and treatment options when upper  
17 394 gastrointestinal bleeding occurs in the ICU. From the *educational* perspective, our data will help clinical  
18 395 teachers understand how bleeding is perceived by patients and families, aiding conversations and  
19 396 counselling regarding tests and treatments for bleeding which are of greatest concern to them. From the  
20 397 *health system* perspective, the results of this study will further the goal of person-centered healthcare  
21 398 which honours patient and family values and perspectives as key evidence.

22 400

### 23 401 **Patient and Public Involvement**

24 402 As a mixed-methods study, whereby qualitative data are dominant and patient and family partnership is  
25 403 paramount, we have already engaged several ICU survivors and family members in completed pilot work.  
26 404 They have helped to develop the educational tools, improve the data collection instruments, and refine  
27 405 the interview guide. We will orient participants to the problem of upper gastrointestinal bleeding by a pre-  
28 406 circulated text summary and standardized slide deck that was co-created by patient and family partners.  
29 407 To ensure that participants have an understanding of the ICU context, we will use criterion sampling to  
30 408 recruit participants who have lived experience with critical illness but avoid an exclusive focus on  
31 409 participants with self-reported high health literacy. An experienced patient partner and family partner are  
32 410 study coinvestigators. Results will be shared with participants in two ways. First, all participants will  
33 411 receive an optional invitation to attend a “member-checking” session, where results will be shared and  
34 412 feedback solicited. This input may be used to further refine results. Final results will be disseminated to all  
35 413 participants via an infographic with accompanying 1 page study brief.

36 414

### 37 415 **Discussion**

38 416

#### 39 417 **Strengths**

40 418 Additional study strengths include the methods which accord with increasingly recommended or required  
41 419 patient involvement in the design, conduct, and dissemination of health research. (3, 36, 37) The  
42 420 qualitative methods allow us to organize, clarify and summarize non-numerical data to build a definition of  
43 421 patient-important bleeding. Future findings will be grounded in the views of members of the public with  
44 422 lived critical care experience, rather than specialized practitioners. To maximize the generalizability of  
45 423 responses, this multicenter study will include participants reflecting hospital catchment areas in at least 3  
46 424 Canadian provinces. A constructivist approach to qualitative inquiry permits patient and family member  
47 425 participants to share information about what truly matters to them, even when those perspectives might  
48 426 conflict with definitions of clinically-important bleeding developed by clinicians and researchers.(38)  
49 427 Multiple analysts contributing different interprofessional and interdisciplinary perspectives contribute to  
50 428 the usefulness and trustworthiness of this research.(39)

51 429

#### 52 430 **Limitations**

53 431 Limitations of this study include no numerical measures of bleeding attributes or preference rankings, as  
54 432 we are eliciting views and values from patients and families using an open-ended, qualitative approach.  
55 433 The goal is not to exclusively characterize morbidity and mortality features of the bleed that are  
56 434 concerning (e.g., short-term risk of death, or long-term disability); indeed we assume that bleeding which  
57 435 leads to death or disability is very important to patients. Our main focus is on tests and treatments used to

1  
2  
3 436 locate and limit the bleeding in order to add additional granularity to what patients find important about  
4 437 bleeding beyond the obvious consequences of dying with or from bleeding. Context is crucial here; out-  
5 438 patients and ward patients with acute or chronic illnesses may have different concerns than ICU patients  
6 439 (e.g., they may be understandably more alarmed about minor bleeds compared to ICU survivors and their  
7 440 families). Thus, our results will not apply to bleeding from sites other than the gastrointestinal system, or  
8 441 to community-dwelling citizens or hospitalized patients who are not critically ill.  
9 442

### 10 443 **Future Research Implications**

11 444 While the patient-important gastrointestinal bleeding definition derived from this study will serve as the  
12 445 quantitative instrument for this secondary outcome in the REVISE Trial, results will also have implications  
13 446 for sample size calculations in future trials on this topic. (40) Patients' and clinicians' views may differ  
14 447 when considering trade-offs related to bleeding. When the current study and the REVISE Trial are  
15 448 complete, it would be worthwhile to explore patient and family perceptions about the balance of risks and  
16 449 benefits of pantoprazole prophylaxis in terms of bleeding, pneumonia, *Clostridioides difficile* and mortality.  
17 450 One study of physicians who treat atrial fibrillation and patients with, or at risk of, developing atrial  
18 451 fibrillation, explored the maximal increased risk of bleeding that respondents would tolerate with warfarin  
19 452 versus aspirin to achieve a reduction in stroke over 2 years. (41) The variability in patient and physician  
20 453 values regarding trade-off between bleeds and strokes likely reflects differential aversion to  
21 454 anticoagulation-associated bleeding and stroke risks. Another study of diverse healthcare providers  
22 455 showed substantial variation in whether and when to restart oral anticoagulation after gastrointestinal  
23 456 bleeding. (42)  
24 457

### 25 458 **Ethics & Dissemination**

26 460 This study has Research Ethics Board (REB) approval at McMaster University (HiREB #9492), and the  
27 461 University of Calgary Conjoint Health Research Ethics Board (REB20-0120).  
28 462

29 463 Potential adverse effects of patient engagement in research from patients' perspectives identified in a  
30 464 recent systematic review related to frustrations with training, transportation, or tokenism - or a false  
31 465 impression of inclusiveness, thereby devaluing patients' input. (9) Advice from our patient partner and  
32 466 family partner who are investigators on this study will ensure that we collaborate sensitively, avoid  
33 467 inauthentic engagement, ensure respectful communication, and offer compensation for their time.  
34 468

35 469 *Findings will be disseminated using an integrated knowledge translation* framework. The integrated  
36 470 approach to knowledge translation is reflected in several patients and family members being integral to  
37 471 the pilot work. Furthermore, a CCCTG Patient and Family Partnership Committee family member and an  
38 472 experienced patient partner are coinvestigators who helped to design this study. *End-of-study knowledge*  
39 473 *translation* will include incorporating results to refine our placeholder definition of patient-important  
40 474 bleeding - presently overt bleeding resulting in invasive tests or treatments.  
41 475

42 476 We will share findings at investigator and CCCTG meetings. Peer-review presentations at international  
43 477 conferences in critical care, gastroenterology and hematology will coincide with or precede open-access  
44 478 peer-review publications. We will translate findings into different languages for diverse audiences in  
45 479 traditional and social media. Our patient and family coinvestigators will help to create an infographic of  
46 480 our findings and clinician-facing educational materials to teach about procedural explanations for  
47 481 gastrointestinal bleeding.  
48 482  
49 483  
50 484  
51 485  
52 486  
53 487  
54 488  
55 489  
56 490  
57 491

1  
2  
3 492  
4 493  
5 494  
6 495  
7 496  
8 497  
9 498  
10 499  
11 500  
12 501  
13 502  
14 503  
15 504  
16 505  
17 506  
18 507  
19 508  
20 509  
21 510  
22 511  
23 512  
24 513  
25 514  
26 515  
27 516  
28 517  
29 518  
30 519  
31 520  
32 521  
33 522  
34 523  
35 524  
36 525  
37 526  
38 527  
39 528  
40 529  
41 530  
42 531

## Acknowledgements

This Patient Important Bleeding Study could not be completed without the patients and family members who agreed to share their time and perspectives. We are grateful to the Patient and Community Engagement Research Partners including Nadine Foster and Bonnie Sept who piloted the interview and focus group guide and provided feedback on the 2-page orienting document and slide deck presentation. We appreciate the preparatory work for this project by Nubia Zepeda and Carmen Hiploylee from the University of Calgary Critical Care Research Group, as well as Alyson Takaoka, Mary Copland and Nicole Zytaruk at McMaster University. We thank the Research Coordinators and Investigators of the REVISE Trial and the Canadian Critical Care Trials Group for their encouragement on this project, as well as Dr. Danae Tassy for suggestions on this manuscript. We would like to acknowledge the thoughtful comments from BMJ Open reviewers Drs. Riccardo Levi, Stefano Skurzak, Riccardo Marmo, and Xingshun Qi. This study was funded by a grant from the Hamilton Academic Health Sciences Organization.

**Protocol:** Available to interested readers by contacting Dr. Cook ([debcook@mcmaster.ca](mailto:debcook@mcmaster.ca))

**Computer code:** Not relevant, no computer code will be used to generate the results.

**Author contribution:** All authors (DJC, MS, KK, KF, JCD, SD, GG, ST, WAH, KEAB, JCM, JGM, AG, SF, AD, JAM, BR, IB, TM, DJN, SWE, MV, MGV) contributed towards the original research idea and provided input into the design of the study. DJC, ST, MS, KK, MGV designed the protocol, drafted and revised the manuscript. SD and AG are patient partners.

**Conflict of Interest:** The following individuals are investigators for the randomized trial REVISE: DJC, JCD, GG, WAH, KEAB, JCM, JGM, SF, AD, JAM, BR, IB, TM, DJN, SWE. We have no other conflicts of interest to declare.

**Data:** Not available.

**Data Statement:** Readers are welcome to contact the research team for further information. In brief, when participants consented to participating in the study, they did not consent to access to transcripts or data beyond what is reported within this report.

[Figure 1: Protocol Infographic](#)

[Appendix Text 1: Summary Text](#)

[Appendix Text 2: Interview and Focus Group Guide](#)



**References**

1. Carman KL, Dardess P, Maurer M, Sofaer S, Adams K, Bechtel C, et al. Patient and family engagement: a framework for understanding the elements and developing interventions and policies. *Health affairs*. 2013;32(2):223-31.
2. Shippee ND, Domecq Garces JP, Prutsky Lopez GJ, Wang Z, Elraiyah TA, Nabhan M, et al. Patient and service user engagement in research: a systematic review and synthesized framework. *Health expectations*. 2015;18(5):1151-66.
3. Canadian Institutes for Health Research. *Strategy for Patient Oriented Research: Patient Engagement Framework*. 2014.
4. Farrier CE, Stelfox HT, Fiest KM. In the pursuit of partnership: patient and family engagement in critical care medicine. *Current Opinion in Critical Care*. 2019;25(5):505-10.
5. Burns KE, Jacob SK, Aguirre V, Gomes J, Mehta S, Rizvi L. Stakeholder engagement in trial design: survey of visitors to critically ill patients regarding preferences for outcomes and treatment options during weaning from mechanical ventilation. *Annals of the American Thoracic Society*. 2016;13(11):1962-8.
6. Burns KE, Misak C, Herridge M, Meade MO, Oczkowski S. Patient and family engagement in the ICU. Untapped opportunities and underrecognized challenges. *American journal of respiratory and critical care medicine*. 2018;198(3):310-9.
7. Vanstone M, Canfield C, Evans C, Leslie M, Lefebvre MA, MacNeil M, et al. Towards conceptualizing patients as partners in health systems: a systematic review and descriptive synthesis. *Health Research Policy and Systems*. 2023;21(1):1-14.
8. Sacristán JA, Aguarón A, Avendaño-Solá C, Garrido P, Carrión J, Gutiérrez A, et al. Patient involvement in clinical research: why, when, and how. *Patient preference and adherence*. 2016:631-40.
9. Domecq JP, Prutsky G, Elraiyah T, Wang Z, Nabhan M, Shippee N, et al. Patient engagement in research: a systematic review. *BMC health services research*. 2014;14(1):1-9.
10. Burns KE, McDonald E, Debigaré S, Zamir N, Vasquez M, Piche-Ayotte M, et al. Patient and family engagement in patient care and research in Canadian intensive care units: a national survey. *Canadian Journal of Anesthesia/Journal canadien d'anesthésie*. 2022:1-10.
11. Arnold DM, Donahoe L, Clarke FJ, Tkaczyk AJ, Heels-Ansdell D, Zytaruk N, et al. Bleeding during critical illness: a prospective cohort study using a new measurement tool. *Clinical and investigative medicine*. 2007:E93-E102.
12. Cook D, Guyatt G, Marshall J, Leasa D, Fuller H, Hall R, et al. A comparison of sucralfate and ranitidine for the prevention of upper gastrointestinal bleeding in patients requiring mechanical ventilation. *New England Journal of Medicine*. 1998;338(12):791-7.
13. Cook DJ, Fuller HD, Guyatt GH, Marshall JC, Leasa D, Hall R, et al. Risk factors for gastrointestinal bleeding in critically ill patients. *New England journal of medicine*. 1994;330(6):377-81.
14. Krag M, Marker S, Perner A, Wetterslev J, Wise MP, Schefold JC, et al. Pantoprazole in patients at risk for gastrointestinal bleeding in the ICU. *New England Journal of Medicine*. 2018;379(23):2199-208.

- 1  
2  
3 579 15. Krag M, Perner A, Wetterslev J, Wise MP, Borthwick M, Bendel S, et al.  
4 580 Prevalence and outcome of gastrointestinal bleeding and use of acid suppressants in  
5 581 acutely ill adult intensive care patients. *Intensive care medicine*. 2015;41(5):833-45.  
6 582 16. Miller A, Hoogstraten B, Staquet M, Winkler A. Reporting results of cancer  
7 583 treatment. *cancer*. 1981;47(1):207-14.  
8 584 17. Rodeghiero F, Tosetto A, Abshire T, Arnold D, Collier B, James P, et al.  
9 585 ISTH/SSC bleeding assessment tool: a standardized questionnaire and a proposal for a  
10 586 new bleeding score for inherited bleeding disorders. *Journal of Thrombosis and*  
11 587 *Haemostasis*. 2010;8(9):2063-5.  
12 588 18. IAP2 Spectrum of Public Participation. International Association for Public  
13 589 Participation. Louisville, CO: International Association for Public Participation; 2018.  
14 590 19. Guyatt G, Montori V, Devereaux P, Schunemann H, Bhandari M. Patients at the  
15 591 center: in our practice, and in our use of language. *ACP journal club*. 2004;140(1):A11.  
16 592 20. Davis RE, Vincent CA, Murphy MF. Blood transfusion safety: the potential role of  
17 593 the patient. *Transfusion medicine reviews*. 2011;25(1):12-23.  
18 594 21. ClinicalTrials.gov. Patient Important Gastrointestinal Bleeding in the ICU  
19 595 ClinicalTrials.gov2022 [updated Aug 18 2022. Available from:  
20 596 <https://clinicaltrials.gov/ct2/show/NCT05506150?cond=patient+important+bleeding&drw=2&rank=1>.  
21 597  
22 598 22. ClinicalTrials.gov. Re-Evaluating the Inhibition of Stress Erosions (REVISE) Trial  
23 599 ClinicalTrials.gov2017 [updated March 16 2022. Available from:  
24 600 <https://clinicaltrials.gov/ct2/show/NCT03374800>.  
25 601 23. Tashakkori A, Teddlie C, Teddlie CB. *Mixed methodology: Combining qualitative*  
26 602 *and quantitative approaches*: sage; 1998.  
27 603 24. Creswell JW, Fetters MD, Ivankova NV. Designing a mixed methods study in  
28 604 primary care. *The Annals of Family Medicine*. 2004;2(1):7-12.  
29 605 25. Patton MQ. Qualitative evaluation checklist. *Evaluation checklists project*.  
30 606 2003;21:1-13.  
31 607 26. Rapley T. Sampling strategies in qualitative research. *The SAGE handbook of*  
32 608 *qualitative data analysis*. 2014:49-63.  
33 609 27. Canadian Critical Care Trials Group. Canadian Critical Care Trials Group 2022  
34 610 [Available from: <https://www.ccctg.ca/>.  
35 611 28. Saunders B, Sim J, Kingstone T, Baker S, Waterfield J, Bartlam B, et al.  
36 612 Saturation in qualitative research: exploring its conceptualization and operationalization.  
37 613 *Quality & quantity*. 2018;52(4):1893-907.  
38 614 29. Malterud K, Siersma VD, Guassora AD. Sample size in qualitative interview  
39 615 studies: guided by information power. *Qualitative health research*. 2016;26(13):1753-60.  
40 616 30. Golafshani N. Understanding reliability and validity in qualitative research. *The*  
41 617 *qualitative report*. 2003;8(4):597-607.  
42 618 31. Sandelowski M. Whatever happened to qualitative description? *Research in*  
43 619 *nursing & health*. 2000;23(4):334-40.  
44 620 32. Hsieh H-F, Shannon SE. Three approaches to qualitative content analysis.  
45 621 *Qualitative health research*. 2005;15(9):1277-88.  
46 622 33. Birt L, Scott S, Cavers D, Campbell C, Walter F. Member checking: a tool to  
47 623 enhance trustworthiness or merely a nod to validation? *Qualitative health research*.  
48 624 2016;26(13):1802-11.

- 1  
2  
3 625 34. Heddle NM, Cook RJ, Webert KE, Sigouin C, Rebullia P, Transfusion  
4 626 BEfSTWPotISfB. Methodologic issues in the use of bleeding as an outcome in  
5 627 transfusion medicine studies. *Transfusion*. 2003;43(6):742-52.  
6  
7 628 35. Wang Y, Ge L, Ye Z, Siemieniuk RA, Reintam Blaser A, Wang X, et al. Efficacy  
8 629 and safety of gastrointestinal bleeding prophylaxis in critically ill patients: an updated  
9 630 systematic review and network meta-analysis of randomized trials. *Intensive Care  
10 631 Medicine*. 2020;46(11):1987-2000.  
11 632 36. National Institute for Health Research. Patient and public involvement in health  
12 633 and social care research: a handbook for researchers. 2018.  
13 634 37. Patient Centered Outcomes Research Institute. Suggest a Patient-Centered  
14 635 Research Question 2012 [updated June 14 2019. Available from:  
15 636 [https://www.pcori.org/engagement/engage-us/suggest-patient-centered-research-  
16 637 question](https://www.pcori.org/engagement/engage-us/suggest-patient-centered-research-question).  
17  
18 638 38. Crotty MJ. The foundations of social research: Meaning and perspective in the  
19 639 research process. *The foundations of social research*. 1998:1-256.  
20 640 39. Patton MQ. Enhancing the quality and credibility of qualitative analysis. *Health  
21 641 services research*. 1999;34(5 Pt 2):1189.  
22 642 40. van Baarle FE, van de Weerd EK, Suurmond B, Müller MC, Vlaar AP, Biemond  
23 643 BJ. Bleeding assessment and bleeding severity in thrombocytopenic patients  
24 644 undergoing invasive procedures. *Transfusion*. 2020;60(3):637.  
25 645 41. Devereaux P, Fahey T, Anderson DR, Gardner MJ, Putnam W, Flowerdew GJ, et  
26 646 al. Differences between perspectives of physicians and patients on anticoagulation in  
27 647 patients with atrial fibrillation: observational studyCommentary: Varied preferences  
28 648 reflect the reality of clinical practice. *Bmj*. 2001;323(7323):1218.  
29  
30 649 42. Little DH, Robertson T, Douketis J, Dionne JC, Holbrook A, Xenodemetropoulos  
31 650 T, et al. Management of antithrombotic therapy after gastrointestinal bleeding: A mixed  
32 651 methods study of health - care providers. *Journal of Thrombosis and Haemostasis*.  
33 652 2021;19(1):153-60.  
34  
35 653  
36  
37  
38  
39  
40  
41  
42  
43  
44  
45  
46  
47  
48  
49  
50  
51  
52  
53  
54  
55  
56  
57  
58  
59  
60

1  
2  
3  
4  
5  
6  
7  
8  
9  
10  
11  
12  
13  
14  
15  
16  
17  
18  
19  
20  
21  
22  
23  
24  
25  
26  
27  
28  
29  
30  
31  
32  
33  
34  
35  
36  
37  
38  
39  
40  
41  
42  
43  
44  
45  
46  
47  
48  
49  
50  
51  
52  
53  
54  
55  
56  
57  
58  
59  
60

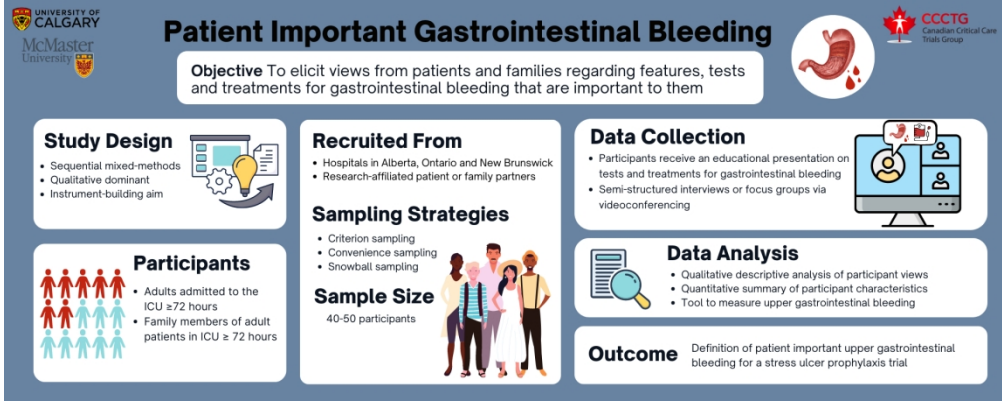

Infographic used to depict the study methods for sharing with potential participants, particularly those who are already research partners in other studies

1336x534mm (38 x 38 DPI)

## Patient Important Gastrointestinal Bleeding in the Intensive Care Unit

The **gastrointestinal (GI) tract** is divided into the upper and lower GI tract. The upper GI tract includes the mouth, esophagus (food pipe), stomach, and duodenum (first part of the small intestine). The lower GI tract includes the rest of the small intestine, bowel (large intestine), and rectum. We will mainly focus on the **stomach**.

The inside of the stomach is very acidic because of the gastric juices it makes. The acid helps the stomach stay sterile between meals and protects it from bacteria, viruses and other organisms that we eat every day. Sometimes, the acidity of the stomach can become too high. Too much acidity can damage the stomach lining and cause **ulcers**. Ulcers can lead to bleeding in the stomach. Medications called **antacids** can make the stomach less acidic.

ICU patients are likely to develop stomach ulcers, which can cause bleeding. There are many reasons why they are likely to develop stomach ulcers. For example, if ICU patients are on a breathing machine for at least 48 hours or have low blood pressure, the stomach lining becomes weak, and the stomach can become more acidic than usual. Acidity that is too high in the stomach can lead to stomach ulcers. Antacid medication, such as pantoprazole is given to ICU patients to prevent ulcers. However, antacid medication can change a patient's natural defense against infections and can have side effects.

We are currently conducting a research study called, "**Re-Evaluating the Inhibition of Stress Erosions: The REVISE Trial.**" The REVISE study will look at the benefits and risks of pantoprazole in ICU patients who are on a breathing machine for at least 48 hours. We will look at whether pantoprazole can reduce the number of patients with GI bleeding and reduce the number of patients who die from GI bleeds (potential benefits of pantoprazole). We will also record the side effects of the medication (eg. lung infections, infectious diarrhea) (potential risks of pantoprazole). We will compare the patients that receive pantoprazole with those that do not receive pantoprazole and look at the benefits and harm of giving the medication. We want to answer the question, should doctors and nurses continue giving pantoprazole to ICU patients on a breathing machine?

Doctors and nurses know what characteristics of a patient's GI bleed are important to them. If there are changes to the patient's heart rate, blood pressure, or abnormal blood results - these are important signs that the doctors and nurses look for and are called **clinically important bleeding**. However, we are missing something very crucial. We don't understand what is important to the patients in the ICU and their families. This is referred to as **patient important bleeding**.

Now that you know more about GI bleeding we want to teach you about the different ways to find and treat a GI bleed.

**TREATMENTS:**

A GI bleed can be treated with the following:

| Therapy                          | Purpose                                               | How Often it is Necessary                                           | Possible Adverse Effects or Discomforts                                                                                                                                  |
|----------------------------------|-------------------------------------------------------|---------------------------------------------------------------------|--------------------------------------------------------------------------------------------------------------------------------------------------------------------------|
| Antacid Drugs                    | To help heal the ulcers                               | <b>ALMOST ALWAYS.</b> Every day for 2-3 months to treat every bleed | <b>SOMETIMES.</b> Pneumonia (lung infection)<br><br><b>VERY RARELY.</b> Infectious diarrhea                                                                              |
| Drugs to Increase Blood Pressure | To increase blood pressure when it is dangerously low | <b>SOMETIMES.</b> Every time blood pressure is dangerously low      | <b>COMMONLY.</b> Very fast heart rate                                                                                                                                    |
| Blood Transfusion                | To replace lost blood                                 | <b>SOMETIMES.</b> It depends on the amount of bleeding              | <b>VERY RARELY.</b> Congestive heart failure (fluid buildup in the lungs because the heart has trouble pumping extra fluid)<br><br><b>VERY RARELY.</b> Lung inflammation |
| Surgery                          | To surgically remove the bleeding tissue              | <b>VERY RARELY.</b> Only in the most serious bleeds                 | <b>VERY RARELY.</b> Risks of general anaesthetic, surgical complications                                                                                                 |

**FINDING (AND TREATING) A GI BLEED:**

To find where a GI bleed is coming from, the following tests can be done. These tests can lead to the treatment of the bleed:

| Procedure                                           | Purpose                                                       | How Often it is Necessary                                      | Possible Adverse Effects or Discomforts                                                                                                                               |
|-----------------------------------------------------|---------------------------------------------------------------|----------------------------------------------------------------|-----------------------------------------------------------------------------------------------------------------------------------------------------------------------|
| Diagnostic Endoscopy                                | To locate the source of the bleeding                          | <b>COMMONLY.</b> For bleeding that is severe                   | <b>COMMONLY.</b> Low blood pressure and drowsiness related to the sedation                                                                                            |
| Therapeutic Endoscopy                               | To try to physically stop the bleeding                        | <b>COMMONLY.</b> Whenever a serious cause of bleeding is found | <b>VERY RARELY.</b> Making the bleeding worse or accidentally making a hole in the stomach                                                                            |
| Angiography                                         | To find the site of bleeding more accurately                  | <b>RARELY.</b> For serious bleeding                            | <b>VERY RARELY.</b> Dye used to find the site of bleeding may cause damage to the kidneys                                                                             |
| Angiography & Embolization (to create a blood clot) | To stop bleeding by creating a blood clot in the blood vessel | <b>RARELY.</b> For serious bleeding                            | <b>VERY RARELY.</b> Dye used to find the site of bleeding may cause damage to the kidneys, or the stomach lining may die from lack of blood supply caused by the clot |

Now that you understand what a GI bleed is and how to find and treat it, we want to know what characteristics of a GI bleed are important to you!

Ethics ID: REB20-0120

Study Title: Patient Important Gastrointestinal Bleeding in the Intensive Care Unit (ICU)

PI: Dr. Kirsten Fiess

Version number/date: Version 1.4/May 19, 2020

For peer review only - <http://bmjopen.bmj.com/site/about/guidelines.xhtml>



## Patient Important Bleeding Online Interview Guide

### Introduction:

Ask everyone present to briefly introduce themselves.

Thank you for taking the time to participate in an interview that we are conducting as part of the REVISE study.

Before we begin the interview, I am going to review a few things:

### Logistics:

- Today's interview will take approximately 1 hour
- If you need to take a break to use the bathroom or take a call, please let me know and we can pause the interview – please remember to use the mute function
- Please ensure that you are in a quiet space with minimal distractions so that I can hear you clearly.
- As was described in the consent form, we will be audio recording today's discussion, and all information shared today will be anonymized—that is, you will not be identified in association with anything you say.
- You can choose to have your video on or off during the discussion. Having your video turned on is preferable as it will help facilitate discussion and allow for a more natural flow of discussion. However, if you are not comfortable, you may turn off this function. We will not be recording any video.

### About the Interview

- I would like to remind you that your participation in this study is voluntary and you can end your participation in the interview at any time.
- YOU ARE THE EXPERT! There are no right or wrong answers to the questions we have for you. We are interested in learning about your experiences and your perspectives.

### Consent

- As I mentioned over email, we do not need to collect your signed consent for this interview. Before we start the interview I do want to check if you had a chance to read the consent form I sent you? (If no, review consent form). If yes – do you have any questions before we begin?



## Patient Important Bleeding Online Interview Guide

### Introduction to Study:

We'd like to share some slides on-screen with you to introduce you to the REVISE Study and provide you with some background information on why we are conducting this study to prevent gastrointestinal bleeding.

**[ share screen – presentation]**

**[ After presenting GI bleed information (and before the information on tests and treatments), stop the presentation at a slide with a picture of a ventilated ICU patient. ]**

**[ Ask people to unmute and click “show small active speaker” in top right-hand corner ]**

Ask the following questions:

1. What do you think of, and what do you feel when you hear the term “GI bleed”?
2. I'd like to ask you to think of this scenario: You or your family member is critically ill in the ICU on a machine which is helping them to breathe called a ventilator. One day, the doctor says that an upper GI bleed has just started a few hours ago. Some blood is seen in the tube placed in the stomach, but it is not clear exactly where the bleeding is coming from, and so far, no particular treatment is needed.
3. What are your concerns about the GI bleed?

*Probes: the amount of bleeding; location of the bleeding; seeing the bleeding; short-term impacts and long-term impacts of the bleeding; reason for the bleeding; how the patient experiences the bleeding (e.g., discomfort, pain); how serious is the bleeding (in the context of the primary reason for admission).*

Thank you for discussing your feelings and concerns about GI bleeds. We are going to return to the presentation to learn about the different tests and treatments that are used to find and stop GI bleed.

**[ return to presentation ]**

Do you have any questions about the information in the presentation?

- Before we begin the interview questions, I just wanted to describe the context for this research study. As you may know: In the ICU patients are often sedated and not able to take part in discussions about their medical tests and treatment options. This is why we are doing this study - it is important to hear from patients and family members about what things are important when considering different tests and treatments for upper GI bleeding.

## Patient Important Bleeding Online Interview Guide

As we move into the interview questions, I am going to begin recording the audio component of our discussion.

**[ start the recording function on Zoom]**

**[ Moderator to share the slide with the spectrum of tests and treatments on the screen ]**

I am going to share my screen again and put up the slide showing the different tests and treatments that might be used for upper GI bleeding.

**[ share screen with online handout]**

Some of these are more invasive than others. It is possible that a blood transfusion may be required or new drugs might be started to increase low blood pressure that develops due to bleeding. In addition, procedures to find out where the bleeding is coming from may be necessary, which might also involve treating the bleed. There are potential risks and benefits to each of these, which we reviewed earlier.

4. Has anyone had personal experience with a GI bleed?" If yes, please describe your experience.
5. Do you have experience with any of these tests or treatments for a GI bleed or for another medical condition? If yes, please describe your experience.
6. The clinical team works with patients and families to make a management plan. Thinking about the scenario whereby you or your family member is on a breathing machine in the ICU and has developed a GI bleed:
  1. Which of the tests and treatments are you most comfortable with? Why?
  2. Which of the tests and treatments concern you the most? Why?

*Probes: We're interested to know what tests and treatments are most preferred and which are least preferred (how and why they made the decision). For example, if participants list drugs first, ask about drugs and ask if all drugs are viewed the same way and then ask explicitly about the different drugs (i.e. antacids and medications to increase blood pressure). Perceptions of level of invasiveness of the test or treatment, level of discomfort for the patient, effectiveness of the test to locate the bleeding, effectiveness of the treatment to stop the bleeding, balancing possible discomfort or risk (e.g., infection) and possible benefit, drug interactions, location where test or treatment is done (i.e., in another part of the hospital vs. just done in their room), if any chronic health conditions or personal experience influence views on the test or treatment, short-term effects, long-term effects, perception of recovery time, if the test or treatment includes the patient being sedated again or put under anesthetic?*

7. Thinking about the scenario where your family member is critically ill, on a breathing machine in the ICU and has developed a GI bleed. Is there anything the care team could do that would make you more comfortable with these tests and treatments?

## Patient Important Bleeding Online Interview Guide

*Probes: Would the clinical condition of the patient change the information they would want to receive or extent to which they are involved (e.g., if GI bleed is not primary concern or the size of the GI bleed), trust in doctor, relationship with doctor, understanding the different options (doctor took the time to explain them and answer questions), hearing the same things about the options from everyone on the medical team, knowing the treatment is commonly used, treatment is a familiar experience (i.e. IV medications), level of emotion experiencing when making the decision, gut feeling/perceptions, not feeling pressured to make a decision, knowing the numbers about the success of the intervention (i.e. % of patients whose response to this treatment is successful).*

8. What do you want to avoid with these tests and treatments?
9. If you found out if any of these tests or treatments were considered life support (i.e., needed to keep the patient alive or save the patient's life), would that change your concerns? Would it change your comfort level? If so, how?

### Wrap Up Discussion

10. Does anyone have any final thoughts they would like to share with us? (*Is there a "take home" message they would like the research team to capture?*)

### Conclusion:

Thank you everyone for your comments. Once again, your participation today is helping us advance the care of patients in the ICU. I can't stress it enough, that we cannot do this research without you! These are all of the questions I have for you.

Do you have any questions for us? (*e.g., length/format of focus group, what worked well/didn't work well for the virtual format*)

As a thank you for your input and your participation in this focus group, we would also like to give you a gift card. This will be emailed to you. We appreciate that you took the time to talk to us!

11. I just have a few demographic questions to ask you now

**[ complete PIB Interview Tracking Requirements Document ]**
